# Supplementary material for: International cohort study indicates no association between alpha-1 blockers and susceptibility to COVID-19 in benign prostatic hyperplasia patients
Source: PubMed Central journal article supplement (PMC9518954; doi:10.3389/fphar.2022.945592), 2022-09-14
Supplement: Presentation1.pdf [file Presentation1.pdf]

## **Supplement to “Use of alpha-1 blockers and susceptibility to COVID-19 in patients with benign prostate hyperplasia: an international cohort study”**

### **Study period and follow-up time**

As described in the main text, we indexed our cohorts at the last prescription of the drugs between November 1st, 2019 and January 31st and followed participants until the earliest of: occurrence of an outcome; end of exposure; death; loss or deregistration from the database; or date of last data collection. We summarized the distribution of the follow-up times by calculating how many patients remain at risk after 50, 100, 150, ... days after their index dates within each database. We include tables of this information alongside Kaplan-Meier plots in Supplementary Figure 1 and 2.

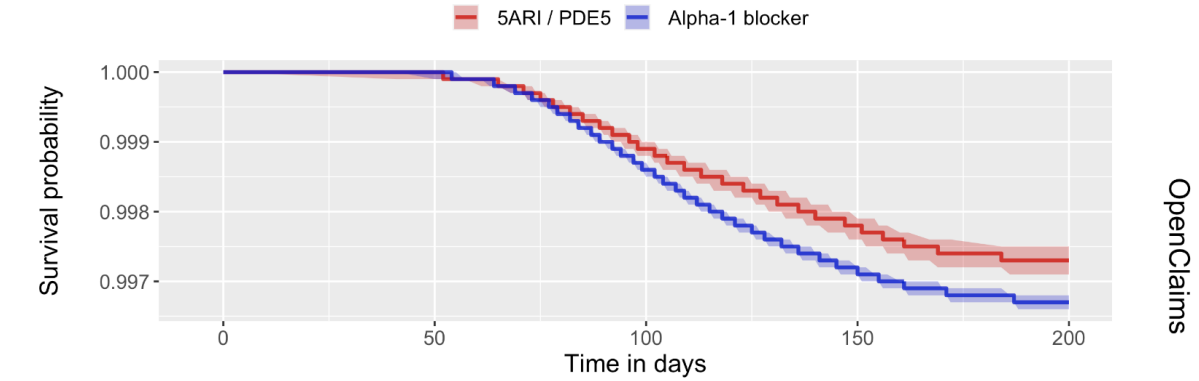

| Number at risk  | 0         | 50        | 100       | 150       | 200     |
|-----------------|-----------|-----------|-----------|-----------|---------|
| Alpha-1 blocker | 1,995,594 | 1,794,264 | 1,484,259 | 1,205,759 | 250,963 |
| 5ARI / PDE5     | 366,734   | 345,589   | 286,905   | 250,326   | 51,879  |

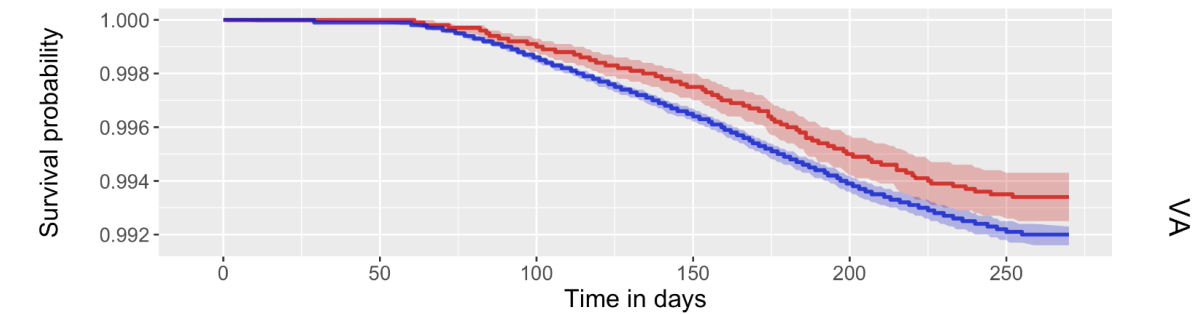

| Number at risk  | 0       | 50      | 100     | 150     | 200     | 250     |
|-----------------|---------|---------|---------|---------|---------|---------|
| Alpha-1 blocker | 360,802 | 336,296 | 263,953 | 250,079 | 183,312 | 121,351 |
| 5ARI / PDE5     | 54,723  | 52,025  | 41,196  | 39,175  | 29,107  | 20,037  |

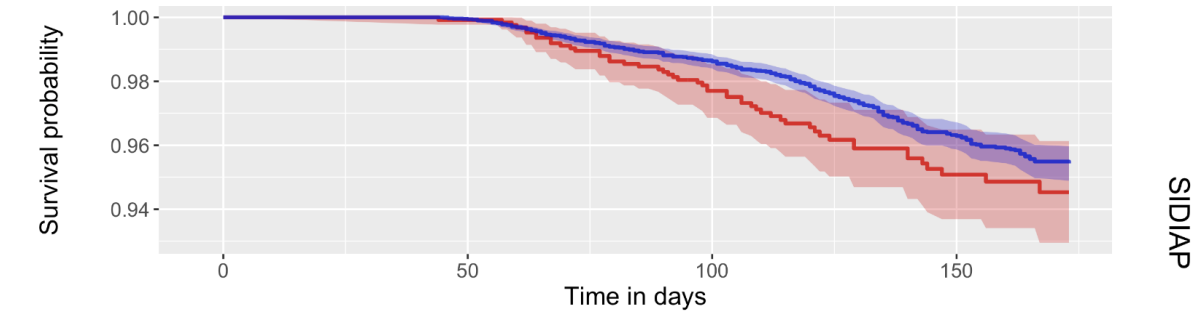

| Number at risk  | 0      | 50     | 100   | 150   |
|-----------------|--------|--------|-------|-------|
| Alpha-1 blocker | 11,793 | 11,181 | 9,801 | 4,008 |
| 5ARI / PDE5     | 1,318  | 1,264  | 1,094 | 489   |

**Supplementary Figure 1(a):** Kaplan-Meier plots for time until COVID-19 diagnosis in the three databases with greater statistical power in terms of estimated MDRRs (OpenClaims, VA, and SIDIAP). Shown beneath each plot are the numbers of at-risk patients in each cohort at various points in time.

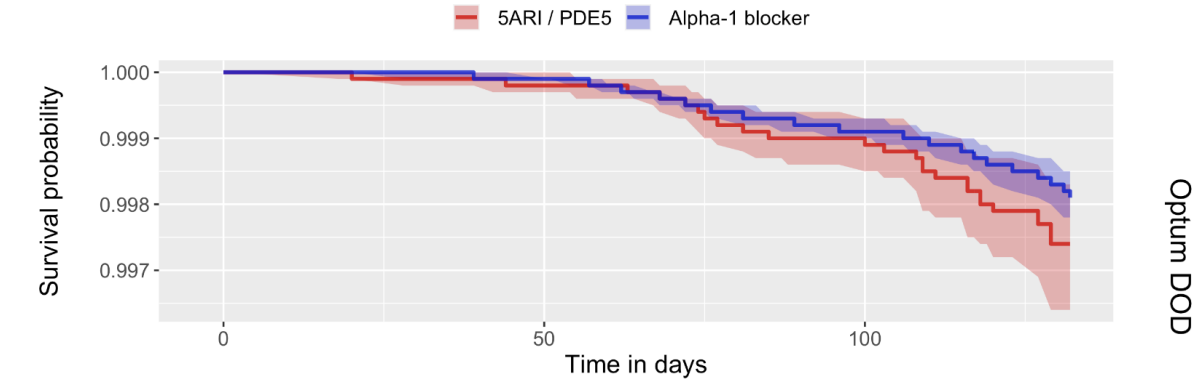

| Number at risk  |         |         |        |
|-----------------|---------|---------|--------|
| Alpha-1 blocker | 241,842 | 210,639 | 72,050 |
| 5ARI / PDE5     | 39,032  | 35,572  | 13,654 |

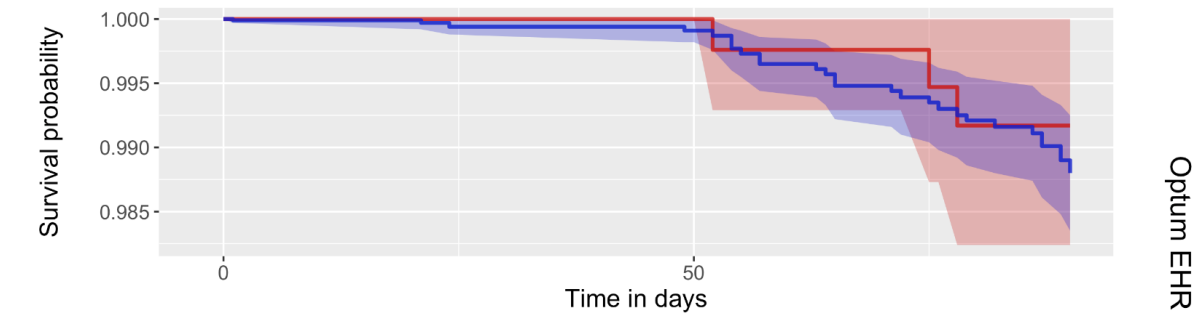

| Number at risk  |        |       |  |
|-----------------|--------|-------|--|
| Alpha-1 blocker | 15,275 | 2,900 |  |
| 5ARI / PDE5     | 2,136  | 428   |  |

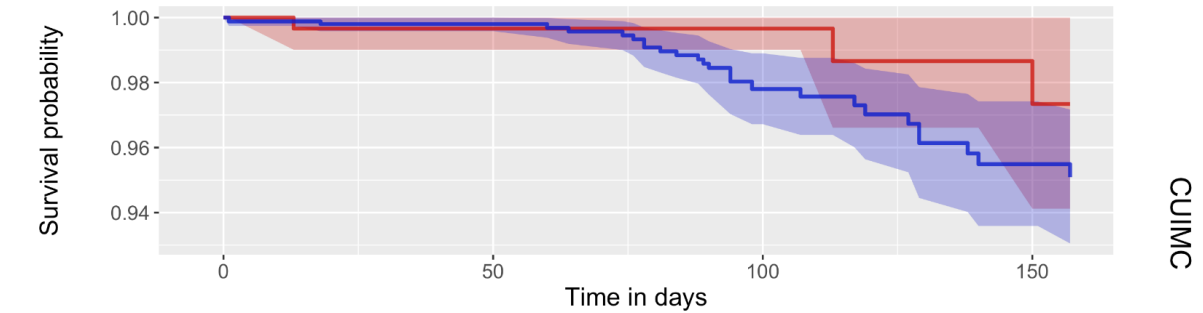

| Number at risk  |       |     |     |     |
|-----------------|-------|-----|-----|-----|
| Alpha-1 blocker | 2,414 | 925 | 435 | 262 |
| 5ARI / PDE5     | 582   | 235 | 110 | 75  |

**Supplementary Figure 1(b):** Kaplan-Meier plots for time until COVID-19 diagnosis in the three databases with lesser statistical power in terms of estimated MDRRs (Optum DOD, Optum EHR, and CUIMC). Shown beneath each plot are the numbers of at-risk patients in each cohort at various points in time.

## **Patient characteristics pre- and post-stratification**

**Supplementary Table 1:** Baseline patient characteristics for Alpha-1 blocker (T) and 5ARI/PDE5 (C) prevalent-use in the SIDIAP, VA, CUIMC, OpenClaims, Optum DOD, and Optum EHR data sources. We report the proportion of use satisfying selected based-line characteristics and the standardized difference of population proportions (SDf) before and after stratification. Less extreme SDf through stratification suggest improved balance between patient cohorts through propensity score adjustment.

| Characteristic                           | SIDJAP                                                |       |       |                                                        |       |       | VA                                                      |       |       |                                                   |       |       | CUIMC                                              |       |       |                                                   |       |       |      |
|------------------------------------------|-------------------------------------------------------|-------|-------|--------------------------------------------------------|-------|-------|---------------------------------------------------------|-------|-------|---------------------------------------------------|-------|-------|----------------------------------------------------|-------|-------|---------------------------------------------------|-------|-------|------|
|                                          | Before stratification<br>N = 11,793 (T) and 1,318 (C) |       |       | After stratification<br>N = 360,802 (T) and 54,723 (C) |       |       | Before stratification<br>N = 360,802 (T) and 54,723 (C) |       |       | After stratification<br>N = 2,414 (T) and 582 (C) |       |       | Before stratification<br>N = 2,414 (T) and 582 (C) |       |       | After stratification<br>N = 2,414 (T) and 582 (C) |       |       |      |
|                                          | T (%)                                                 | C (%) | SDF   | T (%)                                                  | C (%) | SDF   | T (%)                                                   | C (%) | SDF   | T (%)                                             | C (%) | SDF   | T (%)                                              | C (%) | SDF   | T (%)                                             | C (%) | SDF   |      |
| Age group                                |                                                       |       |       |                                                        |       |       |                                                         |       |       |                                                   |       |       |                                                    |       |       |                                                   |       |       |      |
| <25                                      | 0.0                                                   | <0.4  | 0.0   | 0.0                                                    | <0.3  | 0.0   | 0.0                                                     | 0.0   | 0.0   | 0.0                                               | 0.0   | 0.0   | 0.0                                                | 0.0   | 0.0   | <0.2                                              | 0.0   | <0.2  | 0.0  |
| 25-29                                    | 0.0                                                   | <0.4  | -0.05 | 0.0                                                    | <0.3  | -0.06 | 0.0                                                     | 0.0   | 0.0   | 0.0                                               | 0.0   | 0.0   | 0.0                                                | 0.0   | 0.0   | 0.0                                               | 0.0   | 0.0   | 0.0  |
| 30-34                                    | 0.0                                                   | <0.4  | -0.04 | 0.0                                                    | <0.3  | -0.04 | 0.1                                                     | 0.0   | 0.04  | 0.1                                               | 0.0   | 0.03  | 0.1                                                | 0.0   | 0.03  | 0.2                                               | <0.9  | 0.01  | 0.2  |
| 35-39                                    | 0.0                                                   | <0.4  | -0.04 | 0.0                                                    | <0.3  | -0.04 | 0.1                                                     | 0.0   | 0.04  | 0.1                                               | 0.0   | 0.03  | 0.1                                                | 0.0   | 0.03  | 0.5                                               | <0.9  | 0.02  | 0.5  |
| 40-44                                    | 0.3                                                   | 0.0   | 0.0   | 0.3                                                    | 0.0   | 0.0   | 0.3                                                     | 0.1   | 0.05  | 0.3                                               | 0.1   | 0.03  | 0.1                                                | 0.03  | 0.5   | <0.9                                              | 0.02  | 0.5   | <0.9 |
| 45-49                                    | 1.1                                                   | 0.5   | 0.06  | 1.1                                                    | 0.7   | 0.04  | 0.8                                                     | 0.3   | 0.07  | 0.7                                               | 0.6   | 0.02  | 1.1                                                | <0.9  | 0.07  | 1.2                                               | <0.9  | 0.12  | 1.2  |
| 50-54                                    | 3.2                                                   | 0.8   | 0.17  | 3.0                                                    | 1.7   | 0.08  | 2.1                                                     | 0.7   | 0.11  | 1.9                                               | 1.7   | 0.01  | 3.0                                                | 2.1   | 0.06  | 3.0                                               | 1.9   | 0.08  | 3.0  |
| 55-59                                    | 7.5                                                   | 3.0   | 0.21  | 7.1                                                    | 7.4   | -0.01 | 4.5                                                     | 2.0   | 0.14  | 4.1                                               | 4.1   | 0.00  | 6.3                                                | 3.4   | 0.13  | 5.9                                               | 5.7   | 0.01  | 5.7  |
| 60-64                                    | 12.2                                                  | 6.0   | 0.22  | 11.5                                                   | 13.3  | -0.05 | 8.5                                                     | 4.7   | 0.16  | 8.0                                               | 8.2   | 0.00  | 12.3                                               | 3.6   | 0.32  | 10.5                                              | 11.8  | -0.04 | 10.5 |
| 65-69                                    | 16.3                                                  | 13.4  | 0.08  | 16.0                                                   | 15.5  | 0.01  | 14.4                                                    | 10.0  | 0.13  | 13.7                                              | 14.0  | -0.01 | 16.2                                               | 12.2  | 0.12  | 15.5                                              | 14.3  | 0.03  | 15.5 |
| 70-74                                    | 19.2                                                  | 16.8  | 0.06  | 19.0                                                   | 19.4  | -0.01 | 31.9                                                    | 28.1  | 0.08  | 31.3                                              | 31.8  | -0.01 | 18.6                                               | 19.6  | -0.02 | 18.6                                              | 20.0  | -0.04 | 18.6 |
| 75-79                                    | 17.7                                                  | 19.2  | -0.04 | 17.8                                                   | 17.7  | 0.00  | 15.8                                                    | 17.1  | -0.04 | 16.0                                              | 15.7  | 0.01  | 16.1                                               | 18.9  | -0.07 | 16.4                                              | 15.4  | 0.03  | 16.4 |
| 80-84                                    | 11.7                                                  | 17.8  | -0.17 | 12.6                                                   | 11.7  | 0.03  | 9.1                                                     | 12.9  | -0.12 | 9.6                                               | 9.4   | 0.01  | 13.6                                               | 18.0  | -0.12 | 14.5                                              | 15.2  | -0.02 | 14.5 |
| 85-89                                    | 7.6                                                   | 13.9  | -0.20 | 8.3                                                    | 7.6   | 0.03  | 7.8                                                     | 13.8  | -0.19 | 8.6                                               | 8.4   | 0.01  | 7.0                                                | 12.5  | -0.18 | 8.1                                               | 9.1   | -0.04 | 8.1  |
| 90-94                                    | 2.6                                                   | 6.9   | -0.20 | 3.0                                                    | 3.5   | -0.03 | 3.6                                                     | 7.5   | -0.17 | 4.1                                               | 4.3   | -0.01 | 3.9                                                | 7.5   | -0.16 | 4.3                                               | 5.0   | -0.03 | 4.3  |
| 95+                                      | 0.4                                                   | 1.1   | -0.08 | 0.4                                                    | 0.9   | -0.06 | 1.1                                                     | 2.5   | -0.11 | 1.3                                               | 1.4   | -0.02 | 0.9                                                | 1.0   | -0.01 | 1.0                                               | <0.9  | 0.02  | 1.0  |
| Gender: female                           |                                                       |       |       |                                                        |       |       |                                                         |       |       |                                                   |       |       |                                                    |       |       |                                                   |       |       |      |
| Medical history: General                 |                                                       |       |       |                                                        |       |       |                                                         |       |       |                                                   |       |       |                                                    |       |       |                                                   |       |       |      |
| Acute respiratory disease                | 8.7                                                   | 9.6   | -0.03 | 8.8                                                    | 8.7   | 0.00  | 6.6                                                     | 5.3   | 0.06  | 6.4                                               | 6.3   | 0.00  | 7.2                                                | 3.9   | 0.14  | 6.6                                               | 6.3   | 0.01  | 6.6  |
| Attention deficit hyperactivity disorder | 0.1                                                   | <0.4  | -0.03 | 0.1                                                    | 0.5   | -0.08 | 0.4                                                     | 0.2   | 0.03  | 0.4                                               | 0.4   | 0.00  | <0.2                                               | <0.9  | 0.00  | <0.2                                              | <0.9  | -0.02 | <0.2 |
| Chronic liver disease                    | 1.5                                                   | 0.9   | 0.06  | 1.5                                                    | 0.8   | 0.06  | 2.6                                                     | 1.5   | 0.08  | 2.5                                               | 2.3   | 0.01  | 2.2                                                | <0.9  | 0.13  | 1.9                                               | 2.0   | 0.00  | 1.9  |
| Chronic obstructive lung disease         | 12.6                                                  | 15.8  | -0.09 | 12.9                                                   | 13.8  | -0.02 | 15.7                                                    | 14.3  | 0.04  | 15.6                                              | 15.6  | 0.00  | 7.6                                                | 3.1   | 0.20  | 6.8                                               | 5.8   | 0.04  | 6.8  |
| Crohn's disease                          | 0.2                                                   | 0.5   | -0.06 | 0.2                                                    | 0.6   | -0.06 | 0.2                                                     | 0.2   | 0.01  | 0.2                                               | 0.2   | 0.00  | 0.2                                                | <0.9  | 0.02  | 0.2                                               | <0.9  | 0.04  | 0.2  |
| Dementia                                 | 2.8                                                   | 5.1   | -0.12 | 2.9                                                    | 3.3   | -0.02 | 3.9                                                     | 6.0   | -0.10 | 4.1                                               | 4.3   | -0.01 | 4.7                                                | 3.3   | 0.07  | 4.5                                               | 5.3   | -0.03 | 4.5  |
| Depressive disorder                      | 9.3                                                   | 9.8   | -0.02 | 9.4                                                    | 9.4   | 0.00  | 18.8                                                    | 14.2  | 0.13  | 18.2                                              | 18.0  | 0.01  | 8.4                                                | 4.3   | 0.17  | 7.7                                               | 5.3   | 0.10  | 7.7  |
| Diabetes mellitus                        | 24.1                                                  | 23.8  | 0.01  | 24.3                                                   | 23.9  | 0.01  | 32.8                                                    | 31.0  | 0.04  | 32.5                                              | 32.8  | 0.00  | 24.6                                               | 15.1  | 0.24  | 22.4                                              | 22.8  | -0.01 | 22.4 |
| Gastroesophageal reflux disease          | 10.3                                                  | 11.7  | -0.04 | 10.4                                                   | 12.2  | -0.06 | 18.9                                                    | 17.7  | 0.03  | 18.7                                              | 18.7  | 0.00  | 11.6                                               | 8.4   | 0.10  | 10.5                                              | 11.4  | -0.03 | 10.5 |
| Gastrointestinal hemorrhage              | 0.9                                                   | 0.5   | 0.06  | 0.9                                                    | 0.4   | 0.07  | 1.3                                                     | 1.0   | 0.03  | 1.2                                               | 1.2   | 0.00  | 2.4                                                | 2.1   | 0.02  | 2.2                                               | 2.9   | -0.04 | 2.2  |
| Human immunodeficiency virus infection   | 0.3                                                   | 0.4   | -0.01 | 0.3                                                    | 0.6   | -0.04 | 0.5                                                     | 0.4   | 0.01  | 0.5                                               | 0.5   | 0.00  | 2.7                                                | 1.4   | 0.09  | 2.5                                               | 4.1   | -0.09 | 2.5  |
| Hypertension                             | 24.7                                                  | 26.6  | -0.04 | 24.8                                                   | 25.2  | -0.01 | 48.7                                                    | 48.3  | 0.01  | 48.6                                              | 48.3  | 0.01  | 41.6                                               | 33.8  | 0.16  | 39.9                                              | 44.7  | -0.10 | 39.9 |
| Hyperlipidemia                           | 55.0                                                  | 58.8  | -0.08 | 55.6                                                   | 53.0  | 0.05  | 58.6                                                    | 57.0  | 0.03  | 58.4                                              | 58.1  | 0.01  | 50.7                                               | 36.4  | 0.29  | 47.5                                              | 51.1  | -0.07 | 47.5 |
| Lesion of liver                          | 1.1                                                   | 0.8   | 0.04  | 1.1                                                    | 1.0   | 0.01  | 2.1                                                     | 1.3   | 0.06  | 2.0                                               | 1.8   | 0.01  | 2.9                                                | <0.9  | 0.17  | 2.5                                               | 2.4   | 0.01  | 2.5  |
| Obesity                                  | 28.6                                                  | 27.2  | 0.03  | 28.5                                                   | 28.1  | 0.01  | 12.3                                                    | 8.8   | 0.11  | 11.8                                              | 11.7  | 0.00  | 7.3                                                | 4.3   | 0.13  | 6.7                                               | 6.2   | 0.02  | 6.7  |
| Osteoarthritis                           | 29.1                                                  | 33.9  | -0.10 | 29.6                                                   | 29.0  | 0.01  | 18.3                                                    | 16.5  | 0.05  | 18.1                                              | 18.1  | 0.00  | 16.2                                               | 11.7  | 0.13  | 14.8                                              | 13.8  | 0.03  | 14.8 |
| Pneumonia                                | 1.0                                                   | 1.1   | 0.00  | 1.0                                                    | 1.1   | -0.01 | 2.2                                                     | 2.0   | 0.01  | 2.1                                               | 2.1   | 0.00  | 6.0                                                | 2.7   | 0.16  | 5.3                                               | 3.9   | 0.07  | 5.3  |
| Psoriasis                                | 4.4                                                   | 3.4   | 0.05  | 4.3                                                    | 2.9   | 0.08  | 1.1                                                     | 1.1   | 0.00  | 1.1                                               | 1.3   | -0.01 | 1.1                                                | 0.9   | 0.03  | 1.0                                               | 1.2   | -0.02 | 1.0  |
| Renal impairment                         | 14.4                                                  | 18.7  | -0.11 | 14.9                                                   | 13.4  | 0.04  | 14.2                                                    | 14.5  | -0.01 | 14.2                                              | 14.2  | 0.00  | 22.4                                               | 13.9  | 0.22  | 20.4                                              | 21.1  | -0.02 | 20.4 |
| Rheumatoid arthritis                     | 0.2                                                   | 0.5   | -0.05 | 0.2                                                    | 0.5   | -0.04 | 1.0                                                     | 1.0   | 0.00  | 0.9                                               | 1.0   | 0.00  | 0.4                                                | <0.9  | 0.01  | 0.4                                               | <0.9  | 0.03  | 0.4  |
| Schizophrenia                            | 0.4                                                   | 0.5   | -0.03 | 0.4                                                    | 0.6   | -0.04 | 1.0                                                     | 0.8   | 0.02  | 1.0                                               | 1.1   | -0.01 | 0.4                                                | <0.9  | 0.04  | 0.4                                               | 1.5   | -0.12 | 0.4  |
| Ulcerative colitis                       | 0.6                                                   | 0.8   | -0.03 | 0.5                                                    | 0.9   | -0.04 | 0.4                                                     | 0.4   | 0.00  | 0.4                                               | 0.4   | -0.01 | 0.2                                                | <0.9  | 0.02  | <0.2                                              | 1.5   | -0.15 | <0.2 |
| Urinary tract infectious disease         | 5.7                                                   | 5.9   | -0.01 | 5.8                                                    | 6.0   | -0.01 | 3.0                                                     | 3.1   | 0.00  | 3.0                                               | 3.1   | 0.00  | 8.8                                                | 7.2   | 0.06  | 8.3                                               | 9.7   | -0.05 | 8.3  |
| Viral hepatitis C                        | 0.9                                                   | 0.6   | 0.04  | 0.9                                                    | 0.6   | 0.04  | 1.6                                                     | 0.8   | 0.07  | 1.5                                               | 1.3   | 0.02  | 1.0                                                | <0.9  | 0.03  | 0.9                                               | 2.0   | -0.10 | 0.9  |
| Visual system disorder                   | 40.9                                                  | 45.2  | -0.09 | 41.5                                                   | 40.9  | 0.01  | 34.1                                                    | 33.8  | 0.00  | 34.0                                              | 34.4  | -0.01 | 15.2                                               | 15.1  | 0.00  | 14.7                                              | 17.1  | -0.07 | 14.7 |

(Continued)

| Characteristic                               | SIDJAP                |       |       |                      |       |       | VA                    |       |       |                      |       |       | CUIMC                 |       |       |                      |       |       |  |
|----------------------------------------------|-----------------------|-------|-------|----------------------|-------|-------|-----------------------|-------|-------|----------------------|-------|-------|-----------------------|-------|-------|----------------------|-------|-------|--|
|                                              | Before stratification |       |       | After stratification |       |       | Before stratification |       |       | After stratification |       |       | Before stratification |       |       | After stratification |       |       |  |
|                                              | T (%)                 | C (%) | SDF   | T (%)                | C (%) | SDF   | T (%)                 | C (%) | SDF   | T (%)                | C (%) | SDF   | T (%)                 | C (%) | SDF   | T (%)                | C (%) | SDF   |  |
| Medical history: Cardiovascular disease      |                       |       |       |                      |       |       |                       |       |       |                      |       |       |                       |       |       |                      |       |       |  |
| Atrial fibrillation                          | 9.0                   | 14.3  | -0.17 | 9.5                  | 9.7   | 0.00  | 11.4                  | 14.4  | -0.09 | 11.8                 | 11.9  | 0.00  | 14.2                  | 17.5  | -0.09 | 14.8                 | 16.7  | -0.05 |  |
| Cerebrovascular disease                      | 3.0                   | 3.9   | -0.05 | 3.1                  | 3.1   | 0.00  | 4.0                   | 4.2   | -0.01 | 4.0                  | 3.9   | 0.00  | 8.4                   | 6.7   | 0.06  | 7.8                  | 9.9   | -0.07 |  |
| Coronary arteriosclerosis                    | 0.0                   | <0.4  | -0.02 | 0.0                  | <0.3  | -0.01 | 17.8                  | 20.1  | -0.06 | 18.1                 | 18.1  | 0.00  | 23.4                  | 21.6  | 0.04  | 22.7                 | 26.0  | -0.08 |  |
| Heart disease                                | 34.4                  | 42.9  | -0.17 | 35.4                 | 34.8  | 0.01  | 33.5                  | 37.6  | -0.08 | 34.1                 | 34.0  | 0.00  | 43.4                  | 39.5  | 0.08  | 42.5                 | 44.6  | -0.04 |  |
| Heart failure                                | 4.2                   | 8.3   | -0.17 | 4.5                  | 5.0   | -0.02 | 7.7                   | 8.6   | -0.03 | 7.8                  | 7.9   | 0.00  | 13.3                  | 10.8  | 0.07  | 12.6                 | 14.4  | -0.05 |  |
| Ischemic heart disease                       | 10.6                  | 12.8  | -0.07 | 10.9                 | 10.7  | 0.00  | 6.4                   | 6.6   | -0.01 | 6.5                  | 6.4   | 0.00  | 9.2                   | 7.2   | 0.07  | 8.4                  | 11.8  | -0.11 |  |
| Peripheral vascular disease                  | 5.4                   | 6.2   | -0.03 | 5.5                  | 5.5   | 0.00  | 5.4                   | 5.6   | -0.01 | 5.5                  | 5.4   | 0.00  | 5.9                   | 5.3   | 0.03  | 5.5                  | 8.9   | -0.13 |  |
| Pulmonary embolism                           | 0.7                   | 1.6   | -0.08 | 0.8                  | 1.7   | -0.09 | 0.7                   | 0.7   | 0.00  | 0.7                  | 0.7   | 0.00  | 1.2                   | 1.2   | 0.00  | 1.0                  | 1.7   | -0.05 |  |
| Venous thrombosis                            | 1.3                   | 1.2   | 0.01  | 1.3                  | 1.4   | -0.01 | 1.3                   | 1.4   | 0.00  | 1.3                  | 1.4   | -0.01 | 2.6                   | <0.9  | 0.17  | 2.4                  | <0.9  | 0.15  |  |
| Medical history: Neoplasms                   |                       |       |       |                      |       |       |                       |       |       |                      |       |       |                       |       |       |                      |       |       |  |
| Hematologic neoplasm                         | 0.8                   | 0.8   | 0.00  | 0.8                  | 0.6   | 0.03  | 1.6                   | 1.7   | -0.01 | 1.6                  | 1.6   | 0.00  | 3.5                   | 2.2   | 0.07  | 3.3                  | 3.1   | 0.01  |  |
| Malignant lymphoma                           | 0.7                   | 0.5   | 0.03  | 0.7                  | 0.3   | 0.05  | 0.9                   | 1.0   | -0.01 | 1.0                  | 0.9   | 0.00  | 2.4                   | 2.6   | -0.01 | 2.3                  | 3.6   | -0.08 |  |
| Malignant neoplasm of anorectum              | 0.6                   | 0.5   | 0.02  | 0.6                  | 0.5   | 0.01  | 0.2                   | 0.1   | 0.01  | 0.2                  | 0.1   | 0.01  | 0.3                   | 0.0   | 0.00  | 0.3                  | 0.0   | 0.00  |  |
| Malignant neoplastic disease                 | 18.4                  | 19.4  | -0.03 | 18.5                 | 17.5  | 0.03  | 12.9                  | 11.5  | 0.04  | 12.7                 | 12.3  | 0.01  | 20.9                  | 15.6  | 0.14  | 20.0                 | 19.8  | 0.01  |  |
| Malignant tumor of breast                    | 0.1                   | <0.4  | -0.01 | 0.1                  | <0.3  | 0.01  | 0.0                   | 0.0   | 0.00  | 0.0                  | 0.0   | 0.00  | <0.2                  | <0.9  | -0.03 | <0.2                 | <0.9  | -0.08 |  |
| Malignant tumor of colon                     | 2.2                   | 2.2   | 0.00  | 2.2                  | 1.9   | 0.02  | 0.4                   | 0.4   | 0.00  | 0.4                  | 0.4   | 0.00  | 0.9                   | <0.9  | 0.03  | 0.8                  | 1.0   | -0.01 |  |
| Malignant tumor of lung                      | 0.2                   | <0.4  | -0.01 | 0.2                  | <0.3  | -0.01 | 0.8                   | 0.7   | 0.01  | 0.8                  | 0.7   | 0.00  | 1.4                   | 0.0   | 0.00  | 1.3                  | 0.0   | 0.00  |  |
| Malignant tumor of urinary bladder           | 2.8                   | 3.8   | -0.05 | 2.9                  | 2.3   | 0.04  | 0.9                   | 1.0   | 0.00  | 0.9                  | 1.0   | 0.00  | 2.2                   | 2.9   | -0.04 | 2.4                  | 3.6   | -0.07 |  |
| Primary malignant neoplasm of prostate       | 4.1                   | 1.7   | 0.15  | 3.9                  | 2.7   | 0.07  | 5.2                   | 3.2   | 0.10  | 4.9                  | 4.6   | 0.01  | 7.2                   | 4.8   | 0.10  | 7.0                  | 5.0   | 0.09  |  |
| Medication use                               |                       |       |       |                      |       |       |                       |       |       |                      |       |       |                       |       |       |                      |       |       |  |
| Antibacterials for systemic use              | 28.5                  | 27.8  | 0.01  | 28.5                 | 28.1  | 0.01  | 24.9                  | 22.2  | 0.06  | 24.5                 | 24.4  | 0.00  | 42.9                  | 34.8  | 0.16  | 41.4                 | 45.5  | -0.08 |  |
| Antidepressants                              | 15.4                  | 18.3  | -0.08 | 15.6                 | 15.2  | 0.01  | 37.1                  | 29.9  | 0.15  | 36.1                 | 35.9  | 0.00  | 19.1                  | 15.6  | 0.09  | 18.3                 | 19.1  | -0.02 |  |
| Antiepileptics                               | 10.0                  | 9.1   | 0.03  | 10.1                 | 9.6   | 0.02  | 29.1                  | 24.1  | 0.11  | 28.5                 | 28.1  | 0.01  | 20.2                  | 12.5  | 0.21  | 18.8                 | 18.6  | 0.00  |  |
| Antiinflammatory and antirheumatic products  | 22.0                  | 17.6  | 0.11  | 21.5                 | 21.5  | 0.00  | 43.6                  | 37.2  | 0.13  | 42.7                 | 42.8  | 0.00  | 20.0                  | 15.1  | 0.13  | 18.8                 | 20.3  | -0.04 |  |
| Antineoplastic agents                        | 1.2                   | 1.1   | 0.01  | 1.2                  | 0.9   | 0.03  | 4.8                   | 4.5   | 0.01  | 4.8                  | 4.7   | 0.00  | 5.0                   | 3.3   | 0.09  | 4.5                  | 6.1   | -0.07 |  |
| Antipsoriaties                               | 2.1                   | 1.9   | 0.02  | 2.1                  | 1.6   | 0.04  | 1.4                   | 1.4   | 0.00  | 1.4                  | 1.4   | 0.00  | 1.9                   | 0.9   | 0.09  | 1.7                  | <0.9  | 0.11  |  |
| Antithrombotic agents                        | 37.7                  | 45.2  | -0.15 | 38.7                 | 37.2  | 0.03  | 39.6                  | 40.1  | -0.01 | 39.7                 | 39.7  | 0.00  | 42.1                  | 29.3  | 0.27  | 39.2                 | 41.1  | -0.04 |  |
| Drugs for acid related disorders             | 47.7                  | 48.9  | -0.03 | 47.9                 | 45.0  | 0.06  | 48.3                  | 44.9  | 0.07  | 47.8                 | 47.8  | 0.00  | 35.4                  | 27.4  | 0.17  | 33.3                 | 36.8  | -0.07 |  |
| Drugs for obstructive airway diseases        | 23.0                  | 26.3  | -0.08 | 23.3                 | 23.9  | -0.01 | 41.6                  | 37.3  | 0.09  | 41.1                 | 40.8  | 0.00  | 21.2                  | 17.2  | 0.10  | 20.2                 | 20.7  | -0.01 |  |
| Drugs used in diabetes                       | 23.8                  | 23.4  | 0.01  | 24.0                 | 23.3  | 0.02  | 32.3                  | 29.7  | 0.06  | 31.9                 | 32.1  | 0.00  | 21.9                  | 14.6  | 0.19  | 20.2                 | 20.8  | -0.01 |  |
| Immunosuppressants                           | 2.0                   | 1.5   | 0.04  | 2.0                  | 1.7   | 0.02  | 3.5                   | 3.0   | 0.03  | 3.4                  | 3.3   | 0.00  | 9.1                   | 3.8   | 0.22  | 8.1                  | 5.4   | 0.11  |  |
| Lipid modifying agents                       | 43.8                  | 46.7  | -0.06 | 44.1                 | 43.1  | 0.02  | 68.3                  | 68.0  | 0.01  | 68.3                 | 68.1  | 0.00  | 49.6                  | 41.7  | 0.16  | 47.9                 | 54.6  | -0.14 |  |
| Opioids                                      | 11.9                  | 12.4  | -0.01 | 11.9                 | 12.7  | -0.02 | 15.2                  | 11.6  | 0.11  | 14.7                 | 14.6  | 0.00  | 22.7                  | 14.2  | 0.22  | 20.4                 | 20.9  | -0.01 |  |
| Psycholeptics                                | 28.8                  | 30.4  | -0.04 | 29.0                 | 29.5  | -0.01 | 24.0                  | 18.7  | 0.13  | 23.2                 | 23.0  | 0.00  | 24.2                  | 17.7  | 0.16  | 22.5                 | 23.6  | -0.03 |  |
| Psychostimulants, ADHD agents and nootropics | 3.3                   | 3.9   | -0.03 | 3.4                  | 3.4   | 0.00  | 1.2                   | 0.8   | 0.04  | 1.1                  | 1.1   | 0.00  | 2.4                   | 1.5   | 0.06  | 2.3                  | 1.7   | 0.05  |  |
| Race                                         |                       |       |       |                      |       |       |                       |       |       |                      |       |       |                       |       |       |                      |       |       |  |
| American Indian or Alaska Native             |                       |       |       |                      |       |       | 0.6                   | 0.6   | 0.01  | 0.6                  | 0.6   | 0.00  | <0.2                  | 0.0   | 0.00  | <0.2                 | 0.0   | 0.00  |  |
| Asian                                        |                       |       |       |                      |       |       | 0.6                   | 0.7   | -0.01 | 0.6                  | 0.6   | 0.00  | 2.2                   | 1.5   | -0.03 | 2.1                  | 1.3   | -0.01 |  |
| Black or African American                    |                       |       |       |                      |       |       | 16.1                  | 12.2  | 0.11  | 15.5                 | 15.4  | 0.00  | 8.3                   | 5.1   | 0.13  | 7.6                  | 9.3   | -0.06 |  |
| Native Hawaiian or Other Pacific Islander    |                       |       |       |                      |       |       | 0.7                   | 0.7   | 0.00  | 0.7                  | 0.7   | 0.00  | 1.1                   | <0.9  | 0.09  | 1.0                  | <0.9  | 0.08  |  |
| White                                        |                       |       |       |                      |       |       | 76.1                  | 79.7  | -0.09 | 76.6                 | 76.7  | 0.00  | 40.0                  | 37.2  | 0.06  | 39.8                 | 40.9  | -0.02 |  |
| Other or unknown                             |                       |       |       |                      |       |       | 5.9                   | 6.2   | -0.01 | 6.0                  | 6.0   | 0.00  | 2.0                   | 2.7   | -0.05 | 2.0                  | 1.5   | 0.04  |  |
| Ethnicity                                    |                       |       |       |                      |       |       |                       |       |       |                      |       |       |                       |       |       |                      |       |       |  |
| Hispanic or Latino                           |                       |       |       |                      |       |       | 5.2                   | 5.4   | -0.01 | 5.2                  | 5.3   | 0.00  | 15.9                  | 9.9   | 0.18  | 14.5                 | 13.3  | 0.04  |  |
| Not Hispanic nor Latino                      |                       |       |       |                      |       |       | 92.3                  | 91.9  | 0.01  | 92.2                 | 92.2  | 0.00  | 38.9                  | 36.5  | 0.05  | 38.6                 | 37.8  | 0.02  |  |

| Characteristic                           | OpenClaims                                                 |       |       |                                                        |       |       | Optum DOD                                               |       |       |                                                      |       |       | Optum EHR                                             |       |       |                                                      |       |       |     |
|------------------------------------------|------------------------------------------------------------|-------|-------|--------------------------------------------------------|-------|-------|---------------------------------------------------------|-------|-------|------------------------------------------------------|-------|-------|-------------------------------------------------------|-------|-------|------------------------------------------------------|-------|-------|-----|
|                                          | Before stratification<br>N = 1,995,594 (T) and 366,734 (C) |       |       | After stratification<br>N = 241,842 (T) and 39,032 (C) |       |       | Before stratification<br>N = 241,842 (T) and 39,032 (C) |       |       | After stratification<br>N = 15,275 (T) and 2,136 (C) |       |       | Before stratification<br>N = 15,275 (T) and 2,136 (C) |       |       | After stratification<br>N = 15,275 (T) and 2,136 (C) |       |       |     |
|                                          | T (%)                                                      | C (%) | SDF   | T (%)                                                  | C (%) | SDF   | T (%)                                                   | C (%) | SDF   | T (%)                                                | C (%) | SDF   | T (%)                                                 | C (%) | SDF   | T (%)                                                | C (%) | SDF   |     |
| Age group                                |                                                            |       |       |                                                        |       |       |                                                         |       |       |                                                      |       |       |                                                       |       |       |                                                      |       |       |     |
| <25                                      | 0.1                                                        | 0.1   | 0.00  | 0.1                                                    | 0.1   | 0.00  | 0.0                                                     | 0.0   | 0.00  | 0.0                                                  | 0.0   | 0.00  | 0.0                                                   | 0.0   | 0.00  | 0.0                                                  | 0.0   | 0.00  | 0.0 |
| 25-29                                    | 0.1                                                        | 0.1   | 0.00  | 0.1                                                    | 0.1   | 0.00  | 0.0                                                     | 0.0   | 0.01  | 0.0                                                  | 0.0   | 0.01  | 0.0                                                   | 0.0   | 0.01  | 0.0                                                  | 0.0   | 0.01  | 0.0 |
| 30-34                                    | 0.1                                                        | 0.1   | -0.01 | 0.1                                                    | -0.01 | 0.0   | 0.0                                                     | 0.0   | 0.00  | 0.0                                                  | 0.0   | 0.00  | 0.0                                                   | 0.0   | 0.00  | 0.0                                                  | 0.0   | 0.00  | 0.0 |
| 35-39                                    | 0.2                                                        | 0.2   | -0.01 | 0.2                                                    | 0.2   | 0.00  | 0.1                                                     | 0.1   | 0.01  | 0.1                                                  | 0.1   | 0.00  | 0.1                                                   | 0.1   | 0.00  | 0.1                                                  | <0.2  | 0.00  | 0.1 |
| 40-44                                    | 0.4                                                        | 0.4   | 0.01  | 0.4                                                    | 0.4   | 0.01  | 0.3                                                     | 0.2   | 0.03  | 0.3                                                  | 0.2   | 0.03  | 0.6                                                   | 0.4   | 0.02  | 0.5                                                  | 0.7   | 0.07  | 0.4 |
| 45-49                                    | 1.2                                                        | 0.8   | 0.04  | 1.2                                                    | 1.0   | 0.01  | 0.8                                                     | 0.5   | 0.04  | 0.8                                                  | 0.6   | 0.02  | 1.6                                                   | 0.7   | 0.08  | 1.5                                                  | 0.7   | 0.07  | 0.4 |
| 50-54                                    | 3.1                                                        | 1.8   | 0.08  | 2.9                                                    | 2.7   | 0.01  | 2.0                                                     | 1.1   | 0.08  | 1.9                                                  | 1.7   | 0.01  | 4.0                                                   | 2.2   | 0.10  | 3.9                                                  | 2.6   | 0.07  | 0.2 |
| 55-59                                    | 7.0                                                        | 4.1   | 0.13  | 6.6                                                    | 6.2   | 0.02  | 4.9                                                     | 2.6   | 0.12  | 4.5                                                  | 4.4   | 0.01  | 9.0                                                   | 5.3   | 0.14  | 8.6                                                  | 8.0   | 0.02  | 0.0 |
| 60-64                                    | 12.2                                                       | 8.1   | 0.14  | 11.6                                                   | 11.3  | 0.01  | 8.5                                                     | 5.3   | 0.12  | 8.0                                                  | 8.0   | 0.00  | 15.3                                                  | 10.2  | 0.16  | 14.6                                                 | 14.8  | -0.01 | 0.0 |
| 65-69                                    | 17.4                                                       | 13.9  | 0.10  | 16.8                                                   | 16.9  | 0.00  | 16.6                                                    | 12.6  | 0.11  | 16.0                                                 | 16.3  | -0.01 | 17.8                                                  | 14.3  | 0.10  | 17.4                                                 | 17.7  | -0.01 | 0.0 |
| 70-74                                    | 19.2                                                       | 19.2  | 0.00  | 19.2                                                   | 19.1  | 0.00  | 21.9                                                    | 20.6  | 0.03  | 21.7                                                 | 21.9  | 0.00  | 17.8                                                  | 17.5  | 0.01  | 17.5                                                 | 20.3  | -0.07 | 0.0 |
| 75-79                                    | 16.7                                                       | 19.2  | -0.07 | 17.1                                                   | 17.4  | -0.01 | 19.7                                                    | 21.9  | -0.05 | 20.0                                                 | 19.9  | 0.00  | 14.8                                                  | 16.8  | -0.05 | 15.1                                                 | 15.1  | 0.00  | 0.0 |
| 80-84                                    | 17.1                                                       | 24.1  | -0.18 | 18.1                                                   | 18.7  | -0.02 | 13.3                                                    | 17.2  | -0.11 | 13.9                                                 | 13.9  | 0.00  | 9.9                                                   | 15.1  | -0.16 | 10.7                                                 | 10.3  | 0.01  | 0.0 |
| 85-89                                    | 5.3                                                        | 7.8   | -0.10 | 5.7                                                    | 5.8   | 0.00  | 2.3                                                     | 3.5   | -0.07 | 2.4                                                  | 2.5   | -0.01 | 9.0                                                   | 17.4  | -0.25 | 10.1                                                 | 10.0  | 0.00  | 0.0 |
| 90-94                                    |                                                            |       |       |                                                        |       |       |                                                         |       |       |                                                      |       |       |                                                       |       |       |                                                      |       |       |     |
| 95+                                      |                                                            |       |       |                                                        |       |       |                                                         |       |       |                                                      |       |       |                                                       |       |       |                                                      |       |       |     |
| Gender: female                           |                                                            |       |       |                                                        |       |       |                                                         |       |       |                                                      |       |       |                                                       |       |       |                                                      |       |       |     |
| Medical history: General                 |                                                            |       |       |                                                        |       |       |                                                         |       |       |                                                      |       |       |                                                       |       |       |                                                      |       |       |     |
| Acute respiratory disease                | 7.1                                                        | 5.8   | 0.05  | 6.9                                                    | 6.9   | 0.00  | 13.2                                                    | 11.3  | 0.06  | 12.9                                                 | 13.1  | -0.01 | 18.4                                                  | 15.1  | 0.09  | 17.9                                                 | 18.4  | -0.01 | 0.0 |
| Attention deficit hyperactivity disorder | 0.3                                                        | 0.2   | 0.02  | 0.3                                                    | 0.3   | 0.00  | 0.5                                                     | 0.3   | 0.04  | 0.5                                                  | 0.4   | 0.01  | 0.7                                                   | 0.7   | 0.01  | 0.7                                                  | 0.9   | -0.02 | 0.0 |
| Chronic liver disease                    | 0.7                                                        | 0.4   | 0.05  | 0.7                                                    | 0.6   | 0.01  | 1.3                                                     | 0.8   | 0.05  | 1.3                                                  | 1.2   | 0.00  | 2.9                                                   | 1.6   | 0.09  | 2.8                                                  | 2.6   | 0.01  | 0.0 |
| Chronic obstructive lung disease         | 7.0                                                        | 5.4   | 0.07  | 6.8                                                    | 6.7   | 0.00  | 13.8                                                    | 11.0  | 0.08  | 13.4                                                 | 13.6  | -0.01 | 17.7                                                  | 13.9  | 0.10  | 17.2                                                 | 17.3  | 0.00  | 0.0 |
| Crohn's disease                          | 0.2                                                        | 0.2   | 0.01  | 0.2                                                    | 0.2   | 0.00  | 0.3                                                     | 0.3   | 0.01  | 0.3                                                  | 0.3   | 0.00  | 0.5                                                   | 0.4   | 0.02  | 0.5                                                  | 0.5   | 0.00  | 0.0 |
| Dementia                                 | 1.8                                                        | 2.3   | -0.03 | 1.9                                                    | 1.9   | 0.00  | 5.2                                                     | 6.3   | -0.04 | 5.4                                                  | 5.5   | 0.00  | 3.7                                                   | 4.4   | -0.03 | 3.8                                                  | 3.3   | 0.03  | 0.0 |
| Depressive disorder                      | 4.6                                                        | 3.4   | 0.06  | 4.5                                                    | 4.3   | 0.01  | 11.6                                                    | 9.0   | 0.09  | 11.3                                                 | 11.2  | 0.00  | 15.2                                                  | 11.1  | 0.12  | 14.6                                                 | 15.3  | -0.02 | 0.0 |
| Diabetes mellitus                        | 19.3                                                       | 16.0  | 0.09  | 18.8                                                   | 18.6  | 0.00  | 32.4                                                    | 28.7  | 0.08  | 31.9                                                 | 32.1  | 0.00  | 31.9                                                  | 24.9  | 0.16  | 31.0                                                 | 33.6  | -0.06 | 0.0 |
| Gastroesophageal reflux disease          | 6.7                                                        | 5.6   | 0.05  | 6.6                                                    | 6.4   | 0.01  | 17.2                                                    | 15.2  | 0.06  | 16.9                                                 | 17.1  | -0.01 | 25.6                                                  | 21.7  | 0.09  | 25.0                                                 | 27.0  | -0.04 | 0.0 |
| Gastrointestinal hemorrhage              | 1.1                                                        | 1.0   | 0.02  | 1.1                                                    | 1.1   | 0.00  | 2.2                                                     | 2.0   | 0.02  | 2.2                                                  | 2.3   | -0.01 | 3.3                                                   | 2.6   | 0.04  | 3.3                                                  | 3.1   | 0.01  | 0.0 |
| Human immunodeficiency virus infection   | 0.3                                                        | 0.3   | 0.01  | 0.3                                                    | 0.3   | 0.00  | 0.4                                                     | 0.4   | 0.01  | 0.4                                                  | 0.5   | -0.02 | 0.7                                                   | 0.7   | 0.00  | 0.6                                                  | 0.9   | -0.03 | 0.0 |
| Hypertlipidemia                          | 29.8                                                       | 28.9  | 0.02  | 29.7                                                   | 29.6  | 0.00  | 60.8                                                    | 61.2  | -0.01 | 60.8                                                 | 61.1  | 0.00  | 62.0                                                  | 61.5  | 0.01  | 61.8                                                 | 62.8  | -0.02 | 0.0 |
| Hypertensive disorder                    | 38.2                                                       | 34.8  | 0.07  | 37.7                                                   | 37.6  | 0.00  | 66.9                                                    | 64.5  | 0.05  | 66.6                                                 | 66.8  | 0.00  | 66.2                                                  | 63.5  | 0.06  | 65.8                                                 | 67.1  | -0.03 | 0.0 |
| Lesion of liver                          | 0.8                                                        | 0.5   | 0.04  | 0.7                                                    | 0.7   | 0.01  | 1.4                                                     | 0.9   | 0.04  | 1.3                                                  | 1.2   | 0.00  | 2.6                                                   | 1.3   | 0.09  | 2.5                                                  | 1.9   | 0.04  | 0.0 |
| Obesity                                  | 3.9                                                        | 2.7   | 0.07  | 3.7                                                    | 3.5   | 0.01  | 11.9                                                    | 8.7   | 0.10  | 11.5                                                 | 11.4  | 0.00  | 19.4                                                  | 12.6  | 0.19  | 18.5                                                 | 20.7  | -0.05 | 0.0 |
| Osteoarthritis                           | 13.5                                                       | 11.3  | 0.07  | 13.2                                                   | 12.9  | 0.01  | 27.0                                                    | 23.7  | 0.08  | 26.6                                                 | 26.7  | 0.00  | 26.9                                                  | 22.2  | 0.11  | 26.3                                                 | 27.8  | -0.03 | 0.0 |
| Pneumonia                                | 2.0                                                        | 1.7   | 0.02  | 2.0                                                    | 1.9   | 0.00  | 3.9                                                     | 3.3   | 0.03  | 3.8                                                  | 4.0   | -0.01 | 6.3                                                   | 5.6   | 0.03  | 6.1                                                  | 6.2   | 0.00  | 0.0 |
| Psoriasis                                | 0.6                                                        | 0.5   | 0.01  | 0.6                                                    | 0.6   | 0.00  | 1.2                                                     | 1.0   | 0.01  | 1.2                                                  | 1.2   | 0.00  | 1.4                                                   | 1.2   | 0.01  | 1.3                                                  | 1.4   | 0.00  | 0.0 |
| Renal impairment                         | 11.2                                                       | 9.7   | 0.05  | 11.1                                                   | 10.8  | 0.01  | 22.4                                                    | 21.2  | 0.03  | 22.3                                                 | 22.3  | 0.00  | 23.7                                                  | 21.6  | 0.05  | 23.5                                                 | 24.2  | -0.02 | 0.0 |
| Rheumatoid arthritis                     | 0.5                                                        | 0.4   | 0.01  | 0.5                                                    | 0.5   | 0.00  | 1.1                                                     | 0.9   | 0.02  | 1.1                                                  | 1.1   | 0.00  | 1.4                                                   | 1.0   | 0.04  | 1.4                                                  | 1.4   | 0.00  | 0.0 |
| Schizophrenia                            | 0.3                                                        | 0.1   | 0.03  | 0.2                                                    | 0.2   | 0.01  | 0.5                                                     | 0.3   | 0.04  | 0.4                                                  | 0.4   | 0.01  | 0.5                                                   | <0.2  | 0.07  | 0.5                                                  | 0.3   | 0.03  | 0.0 |
| Ulcerative colitis                       | 0.2                                                        | 0.2   | 0.00  | 0.2                                                    | 0.2   | -0.01 | 0.4                                                     | 0.4   | -0.01 | 0.4                                                  | 0.5   | -0.01 | 0.6                                                   | 0.5   | 0.01  | 0.6                                                  | 0.6   | -0.01 | 0.0 |
| Urinary tract infectious disease         | 4.3                                                        | 3.6   | 0.04  | 4.2                                                    | 4.1   | 0.00  | 8.1                                                     | 7.1   | 0.04  | 8.0                                                  | 7.9   | 0.00  | 6.7                                                   | 5.0   | 0.07  | 6.5                                                  | 5.3   | 0.05  | 0.0 |
| Viral hepatitis C                        | 0.4                                                        | 0.2   | 0.05  | 0.4                                                    | 0.3   | 0.02  | 0.7                                                     | 0.3   | 0.06  | 0.7                                                  | 0.6   | 0.02  | 1.3                                                   | 0.6   | 0.07  | 1.2                                                  | 0.8   | 0.04  | 0.0 |
| Visual system disorder                   | 15.2                                                       | 16.7  | -0.04 | 15.4                                                   | 15.8  | -0.01 | 34.5                                                    | 38.1  | -0.07 | 35.0                                                 | 34.9  | 0.00  | 16.0                                                  | 15.7  | 0.01  | 15.9                                                 | 17.0  | -0.03 | 0.0 |

| Characteristic                               | OpenClaims            |       |       |                      |       |       | Optum DOD             |       |       |                      |       |       | Optum EHR             |       |       |                      |       |       |  |
|----------------------------------------------|-----------------------|-------|-------|----------------------|-------|-------|-----------------------|-------|-------|----------------------|-------|-------|-----------------------|-------|-------|----------------------|-------|-------|--|
|                                              | Before stratification |       |       | After stratification |       |       | Before stratification |       |       | After stratification |       |       | Before stratification |       |       | After stratification |       |       |  |
|                                              | T (%)                 | C (%) | SDF   | T (%)                | C (%) | SDF   | T (%)                 | C (%) | SDF   | T (%)                | C (%) | SDF   | T (%)                 | C (%) | SDF   | T (%)                | C (%) | SDF   |  |
| Medical history: Cardiovascular disease      |                       |       |       |                      |       |       |                       |       |       |                      |       |       |                       |       |       |                      |       |       |  |
| Atrial fibrillation                          | 7.5                   | 8.6   | -0.04 | 7.7                  | 7.8   | 0.00  | 14.0                  | 16.0  | -0.05 | 14.3                 | 14.4  | 0.00  | 16.4                  | 20.7  | -0.11 | 16.9                 | 16.8  | 0.00  |  |
| Cerebrovascular disease                      | 3.3                   | 3.2   | 0.00  | 3.3                  | 3.3   | 0.00  | 7.4                   | 7.3   | 0.00  | 7.4                  | 7.4   | 0.00  | 7.6                   | 7.4   | 0.01  | 7.6                  | 8.2   | -0.02 |  |
| Coronary atherosclerosis                     | 11.5                  | 11.3  | 0.01  | 11.5                 | 11.7  | -0.01 | 23.6                  | 23.4  | 0.00  | 23.5                 | 23.7  | 0.00  | 27.9                  | 26.1  | 0.04  | 27.8                 | 27.8  | 0.00  |  |
| Heart disease                                | 23.5                  | 23.7  | 0.00  | 23.5                 | 23.8  | -0.01 | 41.8                  | 42.5  | -0.01 | 41.9                 | 42.1  | 0.00  | 47.8                  | 47.9  | 0.00  | 47.8                 | 48.3  | -0.01 |  |
| Heart failure                                | 5.7                   | 5.3   | 0.01  | 5.6                  | 5.6   | 0.00  | 11.4                  | 10.8  | 0.02  | 11.4                 | 11.5  | 0.00  | 14.0                  | 13.0  | 0.03  | 13.9                 | 14.2  | -0.01 |  |
| Ischemic heart disease                       | 4.0                   | 3.6   | 0.03  | 4.0                  | 4.0   | 0.00  | 10.0                  | 9.2   | 0.02  | 9.9                  | 9.9   | 0.00  | 14.5                  | 12.7  | 0.05  | 14.3                 | 15.4  | -0.03 |  |
| Peripheral vascular disease                  | 4.0                   | 3.5   | 0.03  | 3.9                  | 3.9   | 0.00  | 11.4                  | 10.2  | 0.04  | 11.2                 | 11.3  | 0.00  | 10.6                  | 9.8   | 0.03  | 10.4                 | 12.7  | -0.07 |  |
| Pulmonary embolism                           | 0.5                   | 0.5   | 0.00  | 0.5                  | 0.5   | 0.00  | 0.9                   | 1.0   | -0.01 | 0.9                  | 1.0   | -0.01 | 1.5                   | 1.1   | 0.04  | 1.5                  | 1.3   | 0.01  |  |
| Venous thrombosis                            | 0.9                   | 0.9   | 0.00  | 0.9                  | 0.9   | 0.00  | 1.8                   | 1.9   | -0.01 | 1.9                  | 1.9   | 0.00  | 2.3                   | 2.5   | -0.01 | 2.3                  | 3.2   | -0.06 |  |
| Medical history: Neoplasms                   |                       |       |       |                      |       |       |                       |       |       |                      |       |       |                       |       |       |                      |       |       |  |
| Hematologic neoplasm                         | 1.2                   | 1.2   | 0.00  | 1.2                  | 1.2   | 0.00  | 2.0                   | 2.0   | 0.00  | 2.0                  | 1.9   | 0.00  | 3.3                   | 3.1   | 0.01  | 3.2                  | 3.3   | 0.00  |  |
| Malignant lymphoma                           | 0.7                   | 0.8   | -0.01 | 0.8                  | 0.8   | 0.00  | 1.1                   | 1.2   | -0.01 | 1.1                  | 1.1   | 0.00  | 1.5                   | 1.7   | -0.01 | 1.6                  | 1.6   | 0.00  |  |
| Malignant neoplasm of anorectum              | 0.2                   | 0.1   | 0.02  | 0.2                  | 0.2   | 0.01  | 0.3                   | 0.2   | 0.02  | 0.3                  | 0.2   | 0.01  | 0.5                   | 0.2   | 0.04  | 0.5                  | 0.3   | 0.03  |  |
| Malignant neoplastic disease                 | 11.1                  | 9.7   | 0.04  | 10.9                 | 10.7  | 0.01  | 17.8                  | 16.9  | 0.03  | 17.7                 | 17.3  | 0.01  | 19.7                  | 18.4  | 0.03  | 19.5                 | 19.9  | -0.01 |  |
| Malignant tumor of breast                    | 0.0                   | 0.0   | 0.00  | 0.0                  | 0.0   | 0.00  | 0.1                   | 0.0   | 0.01  | 0.1                  | 0.0   | 0.01  | 0.1                   | <0.2  | 0.00  | 0.1                  | <0.2  | 0.01  |  |
| Malignant tumor of colon                     | 0.4                   | 0.3   | 0.01  | 0.4                  | 0.4   | 0.00  | 0.7                   | 0.6   | 0.02  | 0.7                  | 0.6   | 0.01  | 0.8                   | 0.7   | 0.01  | 0.8                  | 0.5   | 0.04  |  |
| Malignant tumor of lung                      | 0.5                   | 0.4   | 0.01  | 0.5                  | 0.5   | 0.00  | 0.8                   | 0.6   | 0.02  | 0.8                  | 0.7   | 0.01  | 1.4                   | 0.9   | 0.04  | 1.3                  | 1.2   | 0.01  |  |
| Malignant tumor of urinary bladder           | 0.9                   | 0.9   | 0.00  | 0.9                  | 0.9   | 0.00  | 1.3                   | 1.7   | -0.03 | 1.4                  | 1.5   | -0.01 | 2.0                   | 2.6   | -0.04 | 2.1                  | 2.8   | -0.05 |  |
| Primary malignant neoplasm of prostate       | 4.8                   | 2.9   | 0.10  | 4.6                  | 4.2   | 0.02  | 7.3                   | 4.8   | 0.11  | 7.0                  | 6.7   | 0.01  | 5.8                   | 3.0   | 0.14  | 5.5                  | 4.7   | 0.04  |  |
| Medication use                               |                       |       |       |                      |       |       |                       |       |       |                      |       |       |                       |       |       |                      |       |       |  |
| Antibacterials for systemic use              | 43.9                  | 40.5  | 0.07  | 43.4                 | 43.3  | 0.00  | 42.1                  | 38.4  | 0.08  | 41.6                 | 41.6  | 0.00  | 49.4                  | 42.3  | 0.14  | 48.5                 | 48.8  | -0.01 |  |
| Antidepressants                              | 24.0                  | 19.6  | 0.11  | 23.3                 | 23.4  | 0.00  | 24.3                  | 20.4  | 0.09  | 23.8                 | 24.1  | -0.01 | 32.1                  | 26.4  | 0.13  | 31.3                 | 33.1  | -0.04 |  |
| Antiepileptics                               | 18.9                  | 14.3  | 0.12  | 18.2                 | 18.0  | 0.01  | 19.8                  | 15.3  | 0.12  | 19.2                 | 19.4  | -0.01 | 26.8                  | 19.3  | 0.18  | 25.7                 | 28.2  | -0.06 |  |
| Antiinflammatory and antirheumatic products  | 26.0                  | 19.6  | 0.15  | 25.0                 | 24.6  | 0.01  | 20.7                  | 16.2  | 0.11  | 20.1                 | 19.7  | 0.01  | 33.0                  | 25.1  | 0.17  | 31.8                 | 34.3  | -0.05 |  |
| Antineoplastic agents                        | 5.5                   | 5.4   | 0.00  | 5.5                  | 5.6   | 0.00  | 4.0                   | 3.9   | 0.01  | 4.0                  | 4.0   | 0.00  | 5.2                   | 5.3   | -0.01 | 5.1                  | 5.3   | -0.01 |  |
| Antipsoriaties                               | 1.0                   | 0.9   | 0.01  | 1.0                  | 1.0   | 0.00  | 1.0                   | 0.8   | 0.02  | 1.0                  | 0.9   | 0.00  | 1.6                   | 1.0   | 0.06  | 1.6                  | 1.2   | 0.03  |  |
| Antithrombotic agents                        | 25.5                  | 24.8  | 0.01  | 25.4                 | 25.5  | 0.00  | 24.7                  | 25.1  | -0.01 | 24.8                 | 25.1  | -0.01 | 61.2                  | 59.7  | 0.03  | 60.9                 | 62.6  | -0.04 |  |
| Drugs for acid related disorders             | 32.0                  | 27.6  | 0.10  | 31.3                 | 31.4  | 0.00  | 31.2                  | 28.2  | 0.06  | 30.8                 | 31.0  | 0.00  | 52.2                  | 46.1  | 0.12  | 51.4                 | 53.6  | -0.04 |  |
| Drugs for obstructive airway diseases        | 31.7                  | 27.7  | 0.09  | 31.1                 | 31.0  | 0.00  | 23.6                  | 19.6  | 0.10  | 23.0                 | 23.3  | -0.01 | 44.7                  | 36.6  | 0.17  | 43.6                 | 44.0  | -0.01 |  |
| Drugs used in diabetes                       | 26.1                  | 21.5  | 0.11  | 25.5                 | 25.4  | 0.00  | 28.0                  | 24.2  | 0.09  | 27.5                 | 27.8  | -0.01 | 32.5                  | 24.7  | 0.17  | 31.5                 | 34.3  | -0.06 |  |
| Immunosuppressants                           | 2.8                   | 2.3   | 0.03  | 2.8                  | 2.7   | 0.00  | 2.8                   | 2.3   | 0.03  | 2.7                  | 2.7   | 0.00  | 4.8                   | 3.5   | 0.07  | 4.7                  | 4.1   | 0.03  |  |
| Lipid modifying agents                       | 61.5                  | 61.9  | -0.01 | 61.6                 | 62.2  | -0.01 | 65.3                  | 66.7  | -0.03 | 65.5                 | 65.8  | -0.01 | 67.0                  | 66.7  | 0.00  | 66.9                 | 69.1  | -0.05 |  |
| Opioids                                      | 18.8                  | 13.6  | 0.14  | 18.0                 | 17.4  | 0.02  | 19.0                  | 14.0  | 0.13  | 18.3                 | 18.0  | 0.01  | 32.6                  | 24.8  | 0.17  | 31.3                 | 34.1  | -0.06 |  |
| Psycholeptics                                | 19.2                  | 16.2  | 0.08  | 18.8                 | 18.7  | 0.00  | 20.2                  | 16.9  | 0.08  | 19.7                 | 19.7  | 0.00  | 38.4                  | 30.2  | 0.17  | 37.2                 | 38.6  | -0.03 |  |
| Psychostimulants, ADHD agents and nootropics | 1.8                   | 1.4   | 0.03  | 1.7                  | 1.8   | 0.00  | 1.3                   | 0.8   | 0.05  | 1.2                  | 1.2   | 0.00  | 3.0                   | 2.2   | 0.06  | 2.9                  | 3.3   | -0.02 |  |
| Race                                         |                       |       |       |                      |       |       |                       |       |       |                      |       |       |                       |       |       |                      |       |       |  |
| American Indian or Alaska Native             |                       |       |       |                      |       |       |                       |       |       |                      |       |       |                       |       |       |                      |       |       |  |
| Asian                                        |                       |       |       |                      |       |       |                       |       |       |                      |       |       |                       |       |       |                      |       |       |  |
| Black or African American                    |                       |       |       |                      |       |       |                       |       |       |                      |       |       |                       |       |       |                      |       |       |  |
| Native Hawaiian or Other Pacific Islander    |                       |       |       |                      |       |       |                       |       |       |                      |       |       |                       |       |       |                      |       |       |  |
| White                                        |                       |       |       |                      |       |       |                       |       |       |                      |       |       |                       |       |       |                      |       |       |  |
| Other or unknown                             |                       |       |       |                      |       |       |                       |       |       |                      |       |       |                       |       |       |                      |       |       |  |
| Ethnicity                                    |                       |       |       |                      |       |       |                       |       |       |                      |       |       |                       |       |       |                      |       |       |  |
| Hispanic or Latino                           |                       |       |       |                      |       |       |                       |       |       |                      |       |       |                       |       |       |                      |       |       |  |
| Not Hispanic nor Latino                      |                       |       |       |                      |       |       |                       |       |       |                      |       |       |                       |       |       |                      |       |       |  |



## **Negative control calibration: estimates before and after**

Negative control experiment uses a large number of “true negatives,” outcomes to which the exposures have no known relation, to detect potential biases induced by residual confoundings. The experiment also diagnoses potential under- or over-coverage of the null effect by the estimated CIs. These results can in turn be used to calibrate our estimates and confidence intervals for the actual clinical questions of interest to correct for potential biases and miscalibrated uncertainty estimates. In practice, negative control calibration typically results in more conservative conclusions with fewer statistically significant findings.

To demonstrate the process of negative control calibration, we first consider what our analysis would have produced had we not adequately addressed confounding. Supplementary Figure 2(a) below shows the results of negative control experiments in comparing the alpha-1 blocker and 5ARI/PDE5 cohorts if no covariates were to be adjusted. Residual confounding is evident. The uncalibrated estimates show that the alpha-1 blocker users tend to have higher hazard ratios on average across the variety of health outcomes. This could indicate, for example, that alpha-1 blocker users have worse baseline health. The calibration debiases the original estimates, in this case by lowering hazard ratios; graphically, the process manifests itself as the calibrated blue dots being shifted leftward compared to the uncalibrated orange ones. The calibration also widens the confidence intervals, with the blue dots shifted upward compared to the orange dots.

The presence of substantial confounding is no surprise in the toy example above. Even when we control for measured confounders, however, there remains substantial concern for residual confounding. This is where negative control experiments become essential. Supplementary Figure 2(b) shows the results of negative control experiments in comparing the alpha-1 blocker and 5ARI/PDE5 cohorts using our large-scale PS stratification analysis. The negative control experiments here reveal at most minor residual confoundings, with the estimates and CIs demonstrating reasonable performance without calibration. Correspondingly, the calibration has rather small effects on the estimates. We also provide numeric values of the uncalibrated estimates in Supplementary Table 3, following the format of Table 3 in the main text.

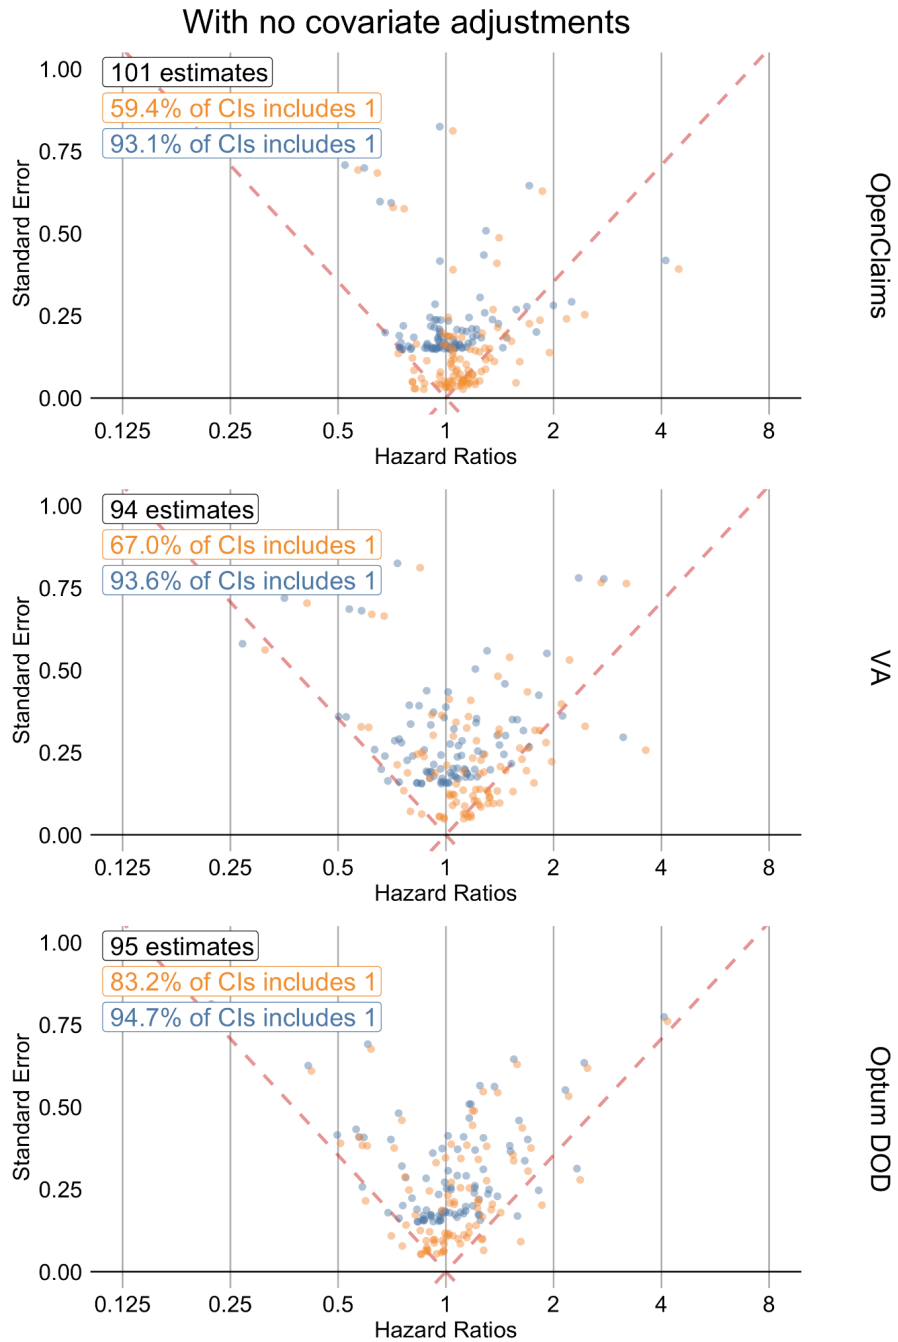

**Supplementary Figure 2(a):** Estimated hazard ratios and standard errors for negative control outcomes when no covariates are adjusted. Orange dots represent original uncalibrated estimates, while blue dots represent calibrated estimates. Shown here are the results for the three larger databases in terms of study cohort sizes (OpenClaims, VA, and Optum DOD).

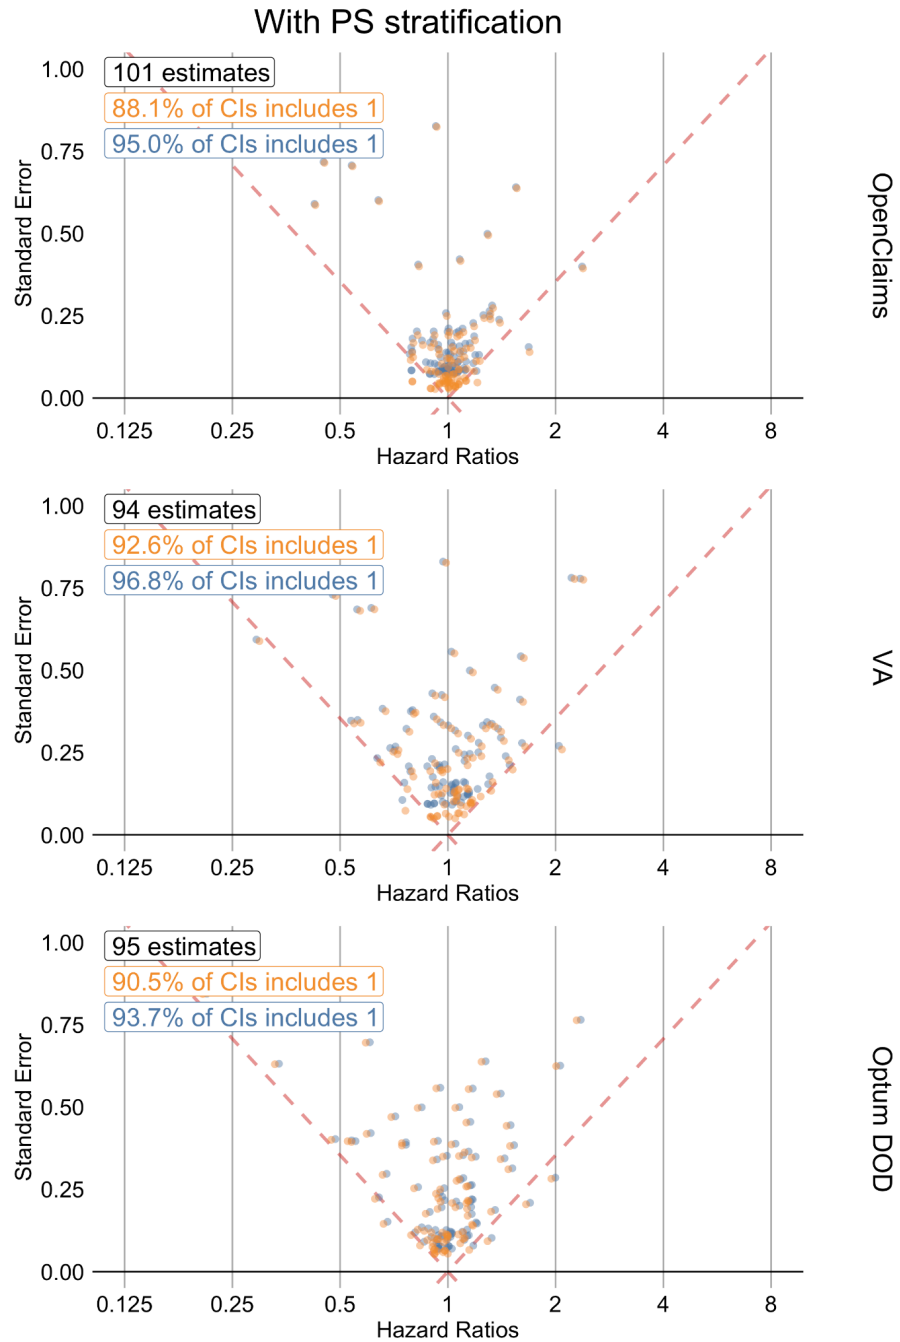

**Supplementary Figure 2(b):** Estimated hazard ratios and standard errors for negative control outcomes when PS stratification is deployed. Compared to the unadjusted case in Figure 1(a), the actual null coverage by the CIs is close to the nominal 95% value even before calibration. This suggests that the stratification by our large-scale PS model has successfully removed most of confoundings.

**Supplementary Table 2:** Uncalibrated hazard ratios, 95% CIs, and p-values for the three COVID-19 outcomes under the stratified and matched analysis across all the six databases. The estimates and CIs are comparable to those of calibrated estimates shown in Table 3 of the main text and, if any, tend to be more conservative overall.

|                      | PS-stratified |               |          | PS-matched |               |          |
|----------------------|---------------|---------------|----------|------------|---------------|----------|
|                      | HR            | 95% CI        | <i>p</i> | HR         | 95% CI        | <i>p</i> |
| Diagnosis            |               |               |          |            |               |          |
| SIDIAP               | 0.90          | (0.67 - 1.23) | 0.50     | 0.83       | (0.61 - 1.16) | 0.26     |
| VA                   | 1.04          | (0.91 - 1.20) | 0.55     | 1.05       | (0.91 - 1.22) | 0.52     |
| CUIMC                | 0.96          | (0.34 - 3.42) | 0.94     | 1.66       | (0.39 - 11.4) | 0.56     |
| OpenClaims           | 1.05          | (0.97 - 1.14) | 0.21     | 1.05       | (0.97 - 1.14) | 0.25     |
| Optum DOD            | 0.67          | (0.49 - 0.94) | 0.02     | 0.73       | (0.50 - 1.08) | 0.10     |
| Optum EHR            | 1.00          | (0.47 - 2.46) | 1.00     | 1.32       | (0.39 - 5.11) | 0.67     |
| Meta-analysis        | 1.03          | (0.96 - 1.10) | 0.46     | 1.01       | (0.93 - 1.11) | 0.76     |
| + Hospitalization    |               |               |          |            |               |          |
| SIDIAP               | 1.00          | (0.64 - 1.67) | 0.99     | 0.88       | (0.53 - 1.52) | 0.63     |
| VA                   | 0.91          | (0.73 - 1.14) | 0.40     | 0.90       | (0.72 - 1.16) | 0.41     |
| CUIMC                | 2.38          | (0.43 - 44.8) | 0.46     | 2.70       | (0.40 - 53.1) | 0.43     |
| OpenClaims           | 1.09          | (0.98 - 1.21) | 0.13     | 1.06       | (0.95 - 1.18) | 0.30     |
| Optum DOD            | 0.62          | (0.43 - 0.92) | 0.01     | 0.75       | (0.48 - 1.18) | 0.20     |
| Optum EHR            | 0.83          | (0.34 - 2.47) | 0.71     | 1.00       | (0.27 - 4.08) | 1.00     |
| Meta-analysis        | 0.98          | (0.86 - 1.13) | 0.80     | 0.99       | (0.89 - 1.11) | 0.91     |
| + Intensive services |               |               |          |            |               |          |
| SIDIAP               | NA            | NA            | NA       | NA         | NA            | NA       |
| VA                   | 1.26          | (0.71 - 2.44) | 0.46     | 1.27       | (0.70 - 2.51) | 0.46     |
| CUIMC                | NA            | NA            | NA       | NA         | NA            | NA       |
| OpenClaims           | NA            | NA            | NA       | NA         | NA            | NA       |
| Optum DOD            | 0.54          | (0.22 - 1.52) | 0.21     | 0.68       | (0.21 - 2.63) | 0.55     |
| Optum EHR            | NA            | NA            | NA       | NA         | NA            | NA       |
| Meta-analysis        | 1.15          | (0.74 - 1.79) | 0.52     | 1.15       | (0.71 - 1.86) | 0.58     |

## Cohort and exposure definitions in OMOP Common Data Model

### Exposures

#### 1. Alpha-blockers

| Concept Id | Concept Name | Domain | Vocabulary | Excluded | Descendants | Mapped |
|------------|--------------|--------|------------|----------|-------------|--------|
| 924566     | tamsulosin   | Drug   | RxNorm     | NO       | YES         | NO     |
| 930021     | alfuzosin    | Drug   | RxNorm     | NO       | YES         | NO     |
| 1341238    | terazosin    | Drug   | RxNorm     | NO       | YES         | NO     |
| 1350489    | prazosin     | Drug   | RxNorm     | NO       | YES         | NO     |

|          |           |      |        |    |     |    |
|----------|-----------|------|--------|----|-----|----|
| 1363053  | doxazosin | Drug | RxNorm | NO | YES | NO |
| 19012925 | silodosin | Drug | RxNorm | NO | YES | NO |

## 2. 5-alpha reductase inhibitors / phosphodiesterase type 5 inhibitor (indicated for BPH)

| Concept Id | Concept Name | Domain | Vocabulary | Excluded | Descendants | Mapped |
|------------|--------------|--------|------------|----------|-------------|--------|
| 989482     | dutasteride  | Drug   | RxNorm     | NO       | YES         | NO     |
| 996416     | finasteride  | Drug   | RxNorm     | NO       | YES         | NO     |
| 1336926    | tadalafil    | Drug   | RxNorm     | NO       | YES         | NO     |

## 3. BPH

| Concept Id | Concept Name                 | Domain    | Vocabulary | Excluded | Descendants | Mapped |
|------------|------------------------------|-----------|------------|----------|-------------|--------|
| 198803     | Benign prostatic hyperplasia | Condition | SNOMED     | NO       | YES         | NO     |

## Outcome Cohort

This section documents the outcome cohort definitions. We consider

- COVID-19 diagnosis or SARS-CoV-2 positive test with no required prior observation
- Hospitalization with a COVID-19 diagnosis record or SARS-CoV-2 positive test with no required prior observation
- Hospitalization and requiring intensive services with a SARS-CoV-2 positive test with no required prior observation

Below are their complete specifications.

[COVID ID133 V1] Persons with a COVID-19 diagnosis or a SARS-CoV-2 positive test with no required prior observation

### Initial Event Cohort

People having any of the following:

- a measurement of SARS-CoV-2 positive test measurement pre-coordinated<sup>2</sup>
  - occurrence start is after 2019-12-01
- a measurement of SARS-CoV-2 test measurement<sup>3</sup>
  - occurrence start is after 2019-12-01
  - value as concept is any of: Detected, Detected, Positive, Positive, Present, Present
- an observation of SARS-CoV-2 test measurement<sup>3</sup>
  - occurrence start is after 2019-12-01
  - value as concept is any of: Detected, Detected, Positive, Positive, Present, Present
- a condition occurrence of COVID-19 conditions<sup>1</sup>
  - occurrence start is after 2019-12-01

with continuous observation of at least 0 days prior and 0 days after event index date, and limit initial events to: **earliest event per person.**

Limit qualifying cohort to: **earliest event per person.**

End Date Strategy

Date Offset Exit Criteria

This cohort definition end date will be the index event's start date plus 1 days

Cohort Collapse Strategy:

Collapse cohort by era with a gap size of 90 days.

### 1. COVID-19 conditions

| Concept Id | Concept Name                          | Domain      | Vocabulary | Excluded | Descendants | Mapped |
|------------|---------------------------------------|-------------|------------|----------|-------------|--------|
| 439676     | Coronavirus infection                 | Condition   | SNOMED     | NO       | YES         | NO     |
| 4100065    | Disease due to Coronaviridae          | Condition   | SNOMED     | NO       | YES         | NO     |
| 37311060   | Suspected disease caused by 2019-nCoV | Observation | SNOMED     | NO       | YES         | NO     |
| 37311061   | Disease caused by 2019-nCoV           | Condition   | SNOMED     | NO       | YES         | NO     |

### 2. SARS-CoV-2 positive test measurement pre-coordinated

| Concept Id | Concept Name                    | Domain      | Vocabulary | Excluded | Descendants | Mapped |
|------------|---------------------------------|-------------|------------|----------|-------------|--------|
| 37310282   | 2019 novel coronavirus detected | Measurement | SNOMED     | NO       | YES         | NO     |

### 3. SARS-CoV-2 test measurement

| Concept Id | Concept Name                                                                | Domain      | Vocabulary     | Excluded | Descendants | Mapped |
|------------|-----------------------------------------------------------------------------|-------------|----------------|----------|-------------|--------|
| 756055     | Measurement of Severe acute respiratory syndrome coronavirus 2 (SARS-CoV-2) | Measurement | OMOP Extension | NO       | YES         | NO     |
| 37310281   | 2019 novel coronavirus not detected                                         | Measurement | SNOMED         | YES      | YES         | NO     |

[COVID ID135 V1] Persons hospitalized with a COVID-19 diagnosis record or a SARS-CoV-2 positive test with no required prior observation

Initial Event Cohort

People having any of the following:

- a visit occurrence of Inpatient Visit<sup>2</sup>
  - occurrence start is after 2019-12-01

with continuous observation of at least 0 days prior and 0 days after event index date, and limit initial events to: **all events per person.**

For people matching the Primary Events, include:

Having any of the following criteria:

- at least 1 occurrences of a measurement of SARS-CoV-2 positive test measurement pre-coordinated<sup>3</sup>
- where event starts between 21 days Before and all days After index start date and event starts between all days Before and 0 days After index end date
- or at least 1 occurrences of a measurement of SARS-CoV-2 test measurement<sup>4</sup>
  - value as concept is any of: Detected, Detected, Positive, Positive, Present, Present
- where event starts between 21 days Before and all days After index start date and event starts between all days Before and 0 days After index end date
- or at least 1 occurrences of an observation of SARS-CoV-2 test measurement<sup>4</sup>
  - value as concept is any of: Detected, Detected, Positive, Positive, Present, Present
- where event starts between 21 days Before and all days After index start date and event starts between all days Before and 0 days After index end date
- or at least 1 occurrences of a condition occurrence of COVID-19 conditions<sup>1</sup>
- where event starts between 21 days Before and all days After index start date and event starts between all days Before and 0 days After index end date

Limit cohort of initial events to: **earliest event per person.**

Limit qualifying cohort to: **earliest event per person.**

End Date Strategy

Date Offset Exit Criteria

This cohort definition end date will be the index event's end date plus 0 days

Cohort Collapse Strategy:

Collapse cohort by era with a gap size of 90 days.

## 1. COVID-19 conditions

| Concept Id | Concept Name                          | Domain      | Vocabulary | Excluded | Descendants | Mapped |
|------------|---------------------------------------|-------------|------------|----------|-------------|--------|
| 439676     | Coronavirus infection                 | Condition   | SNOMED     | NO       | YES         | NO     |
| 4100065    | Disease due to Coronaviridae          | Condition   | SNOMED     | NO       | YES         | NO     |
| 37311060   | Suspected disease caused by 2019-nCoV | Observation | SNOMED     | NO       | YES         | NO     |
| 37311061   | Disease caused by 2019-nCoV           | Condition   | SNOMED     | NO       | YES         | NO     |

## 2. Inpatient Visit

| Concept Id | Concept Name                       | Domain | Vocabulary | Excluded | Descendants | Mapped |
|------------|------------------------------------|--------|------------|----------|-------------|--------|
| 262        | Emergency Room and Inpatient Visit | Visit  | Visit      | NO       | YES         | NO     |
| 9201       | Inpatient Visit                    | Visit  | Visit      | NO       | YES         | NO     |

### 3. SARS-CoV-2 positive test measurement pre-coordinated

| Concept Id | Concept Name                    | Domain      | Vocabulary | Excluded | Descendants | Mapped |
|------------|---------------------------------|-------------|------------|----------|-------------|--------|
| 37310282   | 2019 novel coronavirus detected | Measurement | SNOMED     | NO       | YES         | NO     |

### 4. SARS-CoV-2 test measurement

| Concept Id | Concept Name                                                                | Domain      | Vocabulary     | Excluded | Descendants | Mapped |
|------------|-----------------------------------------------------------------------------|-------------|----------------|----------|-------------|--------|
| 756055     | Measurement of Severe acute respiratory syndrome coronavirus 2 (SARS-CoV-2) | Measurement | OMOP Extension | NO       | YES         | NO     |
| 37310281   | 2019 novel coronavirus not detected                                         | Measurement | SNOMED         | YES      | YES         | NO     |

[COVID ID137 V1] Persons hospitalized and requiring intensive services with a COVID-19 diagnosis record or a SARS-CoV-2 positive test with no required prior observation

#### Initial Event Cohort

People having any of the following:

- a procedure of Mechanical ventilation<sup>4</sup>
  - occurrence start is after 2019-12-01
- a condition occurrence of Mechanical ventilation<sup>4</sup>
  - occurrence start is after 2019-12-01
- an observation of Mechanical ventilation<sup>4</sup>
  - occurrence start is after 2019-12-01
- a procedure of tracheostomy<sup>7</sup>
  - occurrence start is after 2019-12-01
- a procedure of Extracorporeal membrane oxygenation (ECMO) procedure<sup>2</sup>
  - occurrence start is after 2019-12-01

with continuous observation of at least 0 days prior and 0 days after event index date, and limit initial events to: **all events per person.**

For people matching the Primary Events, include:

Having all of the following criteria:

- at least 1 occurrences of a visit occurrence of Inpatient Visit<sup>3</sup>



- Having any of the following criteria:
  - at least 1 occurrences of a measurement of SARS-CoV-2 positive test measurement pre-coordinated<sup>5</sup>
  - where event starts between 21 days Before and all days After index start date and event starts between all days Before and 0 days After index end date
  - or at least 1 occurrences of a measurement of SARS-CoV-2 test measurement<sup>6</sup>
    - value as concept is any of: Detected, Detected, Positive, Positive, Present, Present
  - where event starts between 21 days Before and all days After index start date and event starts between all days Before and 0 days After index end date
  - or at least 1 occurrences of an observation of SARS-CoV-2 test measurement<sup>6</sup>
    - value as concept is any of: Detected, Detected, Positive, Positive, Present, Present
  - where event starts between 21 days Before and all days After index start date and event starts between all days Before and 0 days After index end date
  - or at least 1 occurrences of a condition occurrence of COVID-19 conditions<sup>1</sup>
  - where event starts between 21 days Before and all days After index start date and event starts between all days Before and 0 days After index end date
- where event starts between all days Before and 0 days After index start date and event ends between 0 days Before and all days After index start date

Limit cohort of initial events to: **earliest event per person.**

Limit qualifying cohort to: **earliest event per person.**

#### End Date Strategy

#### Date Offset Exit Criteria

This cohort definition end date will be the index event's end date plus 0 days

#### Cohort Collapse Strategy:

Collapse cohort by era with a gap size of 90 days.

#### 1. COVID-19 conditions

| Concept Id | Concept Name                          | Domain      | Vocabulary | Excluded | Descendants | Mapped |
|------------|---------------------------------------|-------------|------------|----------|-------------|--------|
| 439676     | Coronavirus infection                 | Condition   | SNOMED     | NO       | YES         | NO     |
| 4100065    | Disease due to Coronaviridae          | Condition   | SNOMED     | NO       | YES         | NO     |
| 37311060   | Suspected disease caused by 2019-nCoV | Observation | SNOMED     | NO       | YES         | NO     |
| 37311061   | Disease caused by 2019-nCoV           | Condition   | SNOMED     | NO       | YES         | NO     |

#### 2. Extracorporeal membrane oxygenation (ECMO) procedure

| Concept Id | Concept Name | Domain | Vocabulary | Excluded | Descendants | Mapped |
|------------|--------------|--------|------------|----------|-------------|--------|
|------------|--------------|--------|------------|----------|-------------|--------|

|          |                                                                                              |           |          |    |     |    |
|----------|----------------------------------------------------------------------------------------------|-----------|----------|----|-----|----|
| 1531630  | Extracorporeal Oxygenation, Membrane, Peripheral Venovenous                                  | Procedure | ICD10PCS | NO | NO  | NO |
| 1531631  | Extracorporeal Oxygenation, Membrane, Peripheral Venovenous                                  | Procedure | ICD10PCS | NO | NO  | NO |
| 1531632  | Extracorporeal Oxygenation, Membrane, Central                                                | Procedure | ICD10PCS | NO | NO  | NO |
| 2002247  | Extracorporeal membrane oxygenation [ECMO]                                                   | Procedure | ICD9Proc | NO | YES | NO |
| 2787820  | Extracorporeal Supersaturated Oxygenation, Intermittent                                      | Procedure | ICD10PCS | NO | NO  | NO |
| 2787821  | Extracorporeal Hyperbaric Oxygenation, Continuous                                            | Procedure | ICD10PCS | NO | NO  | NO |
| 4052536  | Extracorporeal membrane oxygenation                                                          | Procedure | SNOMED   | NO | YES | NO |
| 4338595  | Cardiac support using extracorporeal membrane oxygenation circuitry                          | Procedure | SNOMED   | NO | NO  | NO |
| 44515635 | Extracorporeal membrane oxygenation                                                          | Procedure | OPCS4    | NO | YES | NO |
| 44811012 | Fluoroscopy guided percutaneous insertion of cannula for extracorporeal membrane oxygenation | Procedure | SNOMED   | NO | NO  | NO |

### 3. Inpatient Visit

| Concept Id | Concept Name                       | Domain | Vocabulary | Excluded | Descendants | Mapped |
|------------|------------------------------------|--------|------------|----------|-------------|--------|
| 262        | Emergency Room and Inpatient Visit | Visit  | Visit      | NO       | YES         | NO     |
| 9201       | Inpatient Visit                    | Visit  | Visit      | NO       | YES         | NO     |

### 4. Mechanical ventilation

| Concept Id | Concept Name                                                                                                          | Domain      | Vocabulary | Excluded | Descendants | Mapped |
|------------|-----------------------------------------------------------------------------------------------------------------------|-------------|------------|----------|-------------|--------|
| 765576     | Orotracheal intubation using bougie device                                                                            | Procedure   | SNOMED     | NO       | YES         | NO     |
| 2108641    | Glossectomy; complete or total, with or without tracheostomy, without radical neck dissection                         | Procedure   | CPT4       | YES      | YES         | NO     |
| 2108642    | Glossectomy; complete or total, with or without tracheostomy, with unilateral radical neck dissection                 | Procedure   | CPT4       | YES      | YES         | NO     |
| 2108681    | Patient receiving care in the intensive care unit (ICU) and receiving mechanical ventilation, 24 hours or less (CRIT) | Observation | CPT4       | NO       | YES         | NO     |
| 2788036    | Respiratory Ventilation, Less than 24 Consecutive Hours                                                               | Procedure   | ICD10PCS   | NO       | YES         | NO     |
| 2788037    | Respiratory Ventilation, 24-96 Consecutive Hours                                                                      | Procedure   | ICD10PCS   | NO       | YES         | NO     |
| 2788038    | Respiratory Ventilation, Greater than 96 Consecutive Hours                                                            | Procedure   | ICD10PCS   | NO       | YES         | NO     |
| 4006318    | Respiratory assist, manual                                                                                            | Procedure   | SNOMED     | YES      | YES         | NO     |
| 4021786    | Fear of disconnection from ventilator                                                                                 | Condition   | SNOMED     | YES      | YES         | NO     |
| 4031379    | Artificial ventilation finding                                                                                        | Condition   | SNOMED     | YES      | YES         | NO     |
| 4072633    | Weaning from mechanically assisted ventilation                                                                        | Procedure   | SNOMED     | NO       | YES         | NO     |
| 4074663    | Diaphragmatic augmentation                                                                                            | Procedure   | SNOMED     | YES      | YES         | NO     |
| 4080957    | Endotracheal respiratory assistance                                                                                   | Procedure   | SNOMED     | NO       | YES         | NO     |

|          |                                                                                     |             |        |     |     |    |
|----------|-------------------------------------------------------------------------------------|-------------|--------|-----|-----|----|
| 4107247  | Inhalation anesthesia, machine system, semi-closed, no rebreathing of primary agent | Procedure   | SNOMED | YES | YES | NO |
| 4168966  | Endotracheal tube present                                                           | Observation | SNOMED | NO  | YES | NO |
| 4219858  | Problem with patient ventilator                                                     | Observation | SNOMED | NO  | YES | NO |
| 4230167  | Artificial respiration                                                              | Procedure   | SNOMED | NO  | YES | NO |
| 4232550  | Home visit for mechanical ventilation care                                          | Observation | SNOMED | NO  | YES | NO |
| 4232891  | Mechanical ventilation response                                                     | Observation | SNOMED | YES | YES | NO |
| 4235361  | Hyperventilation therapy for traumatic brain injury                                 | Procedure   | SNOMED | NO  | YES | NO |
| 4237618  | Ventilator care                                                                     | Observation | SNOMED | NO  | YES | NO |
| 4251737  | Ventilator care management                                                          | Procedure   | SNOMED | NO  | YES | NO |
| 4254108  | Resuscitation with artificial respiration                                           | Procedure   | SNOMED | YES | YES | NO |
| 4254905  | Ventilator care education                                                           | Procedure   | SNOMED | YES | YES | NO |
| 4259233  | Ventilator care assessment                                                          | Procedure   | SNOMED | YES | YES | NO |
| 4332501  | Management of noninvasive mechanical ventilation                                    | Procedure   | SNOMED | NO  | YES | NO |
| 4348300  | Expired air ventilation                                                             | Procedure   | SNOMED | YES | YES | NO |
| 4353715  | Ventilator finding                                                                  | Observation | SNOMED | YES | YES | NO |
| 37116689 | Insertion of endotracheal ventilation catheter                                      | Procedure   | SNOMED | NO  | YES | NO |
| 37206832 | Mechanical insufflation exsufflation                                                | Procedure   | SNOMED | NO  | YES | NO |
| 40481547 | Dependence on ventilator                                                            | Condition   | SNOMED | NO  | YES | NO |
| 40487536 | Intubation of respiratory tract                                                     | Procedure   | SNOMED | NO  | YES | NO |

|          |                                                                                                                                              |           |        |     |     |    |
|----------|----------------------------------------------------------------------------------------------------------------------------------------------|-----------|--------|-----|-----|----|
| 42738852 | Ventilation assist and management, initiation of pressure or volume preset ventilators for assisted or controlled breathing; first day       | Procedure | CPT4   | NO  | YES | NO |
| 42738853 | Ventilation assist and management, initiation of pressure or volume preset ventilators for assisted or controlled breathing; subsequent days | Procedure | CPT4   | NO  | YES | NO |
| 44509482 | Other specified ventilation support                                                                                                          | Procedure | OPCS4  | NO  | YES | NO |
| 44791135 | Ventilatory support                                                                                                                          | Procedure | SNOMED | NO  | YES | NO |
| 44808555 | Provision of mechanical ventilator                                                                                                           | Procedure | SNOMED | YES | YES | NO |
| 45887795 | Ventilation assist and management, initiation of pressure or volume preset ventilators for assisted or controlled breathing                  | Procedure | CPT4   | NO  | YES | NO |

| <b>Concept Id</b> | <b>Concept Name</b>                                                                                                   | <b>Domain</b> | <b>Vocabulary</b> | <b>Excluded</b> | <b>Descendants</b> | <b>Mapped</b> |
|-------------------|-----------------------------------------------------------------------------------------------------------------------|---------------|-------------------|-----------------|--------------------|---------------|
| 765576            | Orotracheal intubation using bougie device                                                                            | Procedure     | SNOMED            | NO              | YES                | NO            |
| 2108641           | Glossectomy; complete or total, with or without tracheostomy, without radical neck dissection                         | Procedure     | CPT4              | YES             | YES                | NO            |
| 2108642           | Glossectomy; complete or total, with or without tracheostomy, with unilateral radical neck dissection                 | Procedure     | CPT4              | YES             | YES                | NO            |
| 2108681           | Patient receiving care in the intensive care unit (ICU) and receiving mechanical ventilation, 24 hours or less (CRIT) | Observation   | CPT4              | NO              | YES                | NO            |

|         |                                                            |           |          |     |     |    |
|---------|------------------------------------------------------------|-----------|----------|-----|-----|----|
| 2788036 | Respiratory Ventilation, Less than 24 Consecutive Hours    | Procedure | ICD10PCS | NO  | YES | NO |
| 2788037 | Respiratory Ventilation, 24-96 Consecutive Hours           | Procedure | ICD10PCS | NO  | YES | NO |
| 2788038 | Respiratory Ventilation, Greater than 96 Consecutive Hours | Procedure | ICD10PCS | NO  | YES | NO |
| 4006318 | Respiratory assist, manual                                 | Procedure | SNOMED   | YES | YES | NO |
| 4021786 | Fear of disconnection from ventilator                      | Condition | SNOMED   | YES | YES | NO |
| 4031379 | Artificial ventilation finding                             | Condition | SNOMED   | YES | YES | NO |

#### 5. SARS-CoV-2 positive test measurement pre-coordinated

| Concept Id | Concept Name                    | Domain      | Vocabulary | Excluded | Descendants | Mapped |
|------------|---------------------------------|-------------|------------|----------|-------------|--------|
| 37310282   | 2019 novel coronavirus detected | Measurement | SNOMED     | NO       | YES         | NO     |

#### 6. SARS-CoV-2 test measurement

| Concept Id | Concept Name                                                                | Domain      | Vocabulary     | Excluded | Descendants | Mapped |
|------------|-----------------------------------------------------------------------------|-------------|----------------|----------|-------------|--------|
| 756055     | Measurement of Severe acute respiratory syndrome coronavirus 2 (SARS-CoV-2) | Measurement | OMOP Extension | NO       | YES         | NO     |
| 37310281   | 2019 novel coronavirus not detected                                         | Measurement | SNOMED         | YES      | YES         | NO     |

#### 7. tracheostomy

| Concept Id | Concept Name                                                                                                      | Domain    | Vocabulary | Excluded | Descendants | Mapped |
|------------|-------------------------------------------------------------------------------------------------------------------|-----------|------------|----------|-------------|--------|
| 45887989   | Transoral approach to skull base, brain stem or upper spinal cord for biopsy, decompression or excision of lesion | Procedure | CPT4       | NO       | YES         | NO     |
| 4337047    | Insertion of tracheostomy tube                                                                                    | Procedure | SNOMED     | NO       | YES         | NO     |

|         |                                                                                                     |           |          |    |     |    |
|---------|-----------------------------------------------------------------------------------------------------|-----------|----------|----|-----|----|
| 4311023 | Revision of stoma of trachea                                                                        | Procedure | SNOMED   | NO | YES | NO |
| 4208093 | Tracheostomy, emergency procedure by transtracheal approach                                         | Procedure | SNOMED   | NO | YES | NO |
| 4199580 | Mediastinal tracheostomy                                                                            | Procedure | SNOMED   | NO | YES | NO |
| 4195473 | Temporary tracheostomy                                                                              | Procedure | SNOMED   | NO | YES | NO |
| 4168864 | Lateral tracheostomy                                                                                | Procedure | SNOMED   | NO | YES | NO |
| 4166281 | Anterior tracheostomy                                                                               | Procedure | SNOMED   | NO | YES | NO |
| 4115488 | Emergency tracheostomy                                                                              | Procedure | SNOMED   | NO | YES | NO |
| 4065590 | Permanent tracheostomy                                                                              | Procedure | SNOMED   | NO | YES | NO |
| 2870619 | Medical and Surgical @ Respiratory System @ Revision @ Trachea @ Percutaneous @ Tracheostomy Device | Procedure | ICD10PCS | NO | YES | NO |
| 2862930 | Medical and Surgical @ Respiratory System @ Revision @ Trachea @ Open @ Tracheostomy Device         | Procedure | ICD10PCS | NO | YES | NO |
| 2836115 | Medical and Surgical @ Respiratory System @ Bypass @ Trachea @ Percutaneous @ Tracheostomy Device   | Procedure | ICD10PCS | NO | YES | NO |
| 2831237 | Medical and Surgical @ Respiratory System @ Bypass @ Trachea @ Open @ Tracheostomy Device           | Procedure | ICD10PCS | NO | YES | NO |
| 2829386 | Medical and Surgical @ Respiratory System @ Revision @ Trachea @ Via Natural or Artificial          | Procedure | ICD10PCS | NO | YES | NO |

|         |                                                                                                                                                                                                                      |           |          |     |     |    |
|---------|----------------------------------------------------------------------------------------------------------------------------------------------------------------------------------------------------------------------|-----------|----------|-----|-----|----|
|         | Opening @<br>Tracheostomy Device                                                                                                                                                                                     |           |          |     |     |    |
| 2829384 | Medical and Surgical<br>@ Respiratory<br>System @ Revision<br>@ Trachea @<br>Percutaneous<br>Endoscopic @<br>Tracheostomy Device                                                                                     | Procedure | ICD10PCS | NO  | YES | NO |
| 2794811 | Medical and Surgical<br>@ Respiratory<br>System @ Change @<br>Trachea @ External<br>@ Tracheostomy<br>Device                                                                                                         | Procedure | ICD10PCS | NO  | YES | NO |
| 2743216 | Removal of<br>Tracheostomy Device<br>from Trachea, Via<br>Natural or Artificial<br>Opening                                                                                                                           | Procedure | ICD10PCS | NO  | YES | NO |
| 2110486 | Transoral approach to<br>skull base, brain stem<br>or upper spinal cord<br>for biopsy,<br>decompression or<br>excision of lesion;<br>requiring splitting of<br>tongue and/or<br>mandible (including<br>tracheostomy) | Procedure | CPT4     | YES | YES | NO |
| 2106569 | Tracheal puncture,<br>percutaneous with<br>transtracheal<br>aspiration and/or<br>injection                                                                                                                           | Procedure | CPT4     | NO  | YES | NO |
| 2106568 | Construction of<br>tracheoesophageal<br>fistula and subsequent<br>insertion of an<br>alaryngeal speech<br>prosthesis (eg, voice<br>button, Blom-Singer<br>prosthesis)                                                | Procedure | CPT4     | NO  | YES | NO |
| 2106567 | Tracheostomy,<br>fenestration procedure<br>with skin flaps                                                                                                                                                           | Procedure | CPT4     | NO  | YES | NO |



|         |                                                                  |           |      |    |     |    |
|---------|------------------------------------------------------------------|-----------|------|----|-----|----|
| 2106565 | Tracheostomy, emergency procedure; cricothyroid membrane         | Procedure | CPT4 | NO | YES | NO |
| 2106563 | Tracheostomy, planned (separate procedure); younger than 2 years | Procedure | CPT4 | NO | YES | NO |
| 2106562 | Tracheostomy, planned (separate procedure)                       | Procedure | CPT4 | NO | YES | NO |

## List of negative control outcomes and OMOP Common Data Model ID

**Supplementary Table 3:** List of negative control outcomes and OMOP Common Data Model IDs.

| Outcome ID | Outcome Name                                             |
|------------|----------------------------------------------------------|
| 436409     | Abnormal pupil                                           |
| 199192     | Abrasion and/or friction burn of trunk without infection |
| 4092879    | Absent kidney                                            |
| 436634     | Acariasis                                                |
| 44783954   | Acid reflux                                              |
| 75911      | Acquired hallux valgus                                   |
| 137951     | Acquired keratoderma                                     |
| 77965      | Acquired trigger finger                                  |
| 376707     | Acute conjunctivitis                                     |
| 4103640    | Amputated foot                                           |
| 432595     | Amyloidosis                                              |
| 73241      | Anal and rectal polyp                                    |
| 437082     | Ankylosing spondylitis                                   |
| 77650      | Aseptic necrosis of bone                                 |
| 378424     | Astigmatism                                              |
| 374923     | Bell's palsy                                             |
| 4110709    | Benign epithelial neoplasm of skin                       |
| 133655     | Burn of forearm                                          |
| 73560      | Calcaneal spur                                           |
| 434327     | Cannabis abuse                                           |
| 4213540    | Cervical somatic dysfunction                             |
| 381581     | Chalazion                                                |
| 140842     | Changes in skin texture                                  |
| 438531     | Chondromalacia                                           |
| 81378      | Chondromalacia of patella                                |

|          |                                          |
|----------|------------------------------------------|
| 432303   | Cocaine abuse                            |
| 4201390  | Colostomy present                        |
| 46269889 | Complication due to Crohn's disease      |
| 134438   | Contact dermatitis                       |
| 78619    | Contusion of knee                        |
| 201606   | Crohn's disease                          |
| 260134   | Croup                                    |
| 76786    | Derangement of knee                      |
| 4115402  | Difficulty sleeping                      |
| 443767   | Disorder of eye due to diabetes mellitus |
| 45757370 | Disproportion of reconstructed breast    |
| 433111   | Effects of hunger                        |
| 441589   | Endocarditis                             |
| 200775   | Endometrial hyperplasia                  |
| 433527   | Endometriosis                            |
| 73008    | Enthesopathy                             |
| 4249170  | Epicondylitis                            |
| 4170770  | Epidermoid cyst                          |
| 4345472  | Epstein-Barr virus disease               |
| 4092896  | Feces contents abnormal                  |
| 259995   | Foreign body in orifice                  |
| 196456   | Gallstone                                |
| 40481632 | Ganglion cyst                            |
| 4166231  | Genetic predisposition                   |
| 74855    | Genital herpes simplex                   |
| 433577   | Hammer toe                               |
| 441818   | Hemangioma                               |
| 4231770  | Hereditary thrombophilia                 |
| 440329   | Herpes zoster without complication       |
| 4012570  | High risk sexual behavior                |
| 4038835  | Hodgkin's disease                        |

|          |                                         |
|----------|-----------------------------------------|
| 4012934  | Homocystinuria                          |
| 441788   | Human papilloma virus infection         |
| 380688   | Hypoglycemic coma                       |
| 4254542  | Hypopituitarism                         |
| 4201717  | Ileostomy present                       |
| 374375   | Impacted cerumen                        |
| 140480   | Impetigo                                |
| 4344500  | Impingement syndrome of shoulder region |
| 139099   | Ingrowing nail                          |
| 444132   | Injury of knee                          |
| 434926   | Iridocyclitis                           |
| 196168   | Irregular periods                       |
| 75576    | Irritable bowel syndrome                |
| 432593   | Kwashiorkor                             |
| 434203   | Late effect of contusion                |
| 438329   | Late effect of motor vehicle accident   |
| 443285   | Lesion of cervix                        |
| 195873   | Leukorrhea                              |
| 440638   | Lyme disease                            |
| 4083487  | Macular drusen                          |
| 4156115  | Malignant neoplasm of endocrine gland   |
| 4103703  | Melena                                  |
| 4134455  | Mononeuropathy                          |
| 4209423  | Nicotine dependence                     |
| 377572   | Noise effects on inner ear              |
| 136368   | Non-toxic multinodular goiter           |
| 40480893 | Nonspecific tuberculin test reaction    |
| 4215978  | Onychomycosis                           |
| 140648   | Onychomycosis due to dermatophyte       |
| 438130   | Opioid abuse                            |
| 192606   | Paraplegia                              |

|          |                                            |
|----------|--------------------------------------------|
| 4091513  | Passing flatus                             |
| 4112731  | Polyp of intestine                         |
| 4202045  | Postviral fatigue syndrome                 |
| 373478   | Presbyopia                                 |
| 46286594 | Problem related to lifestyle               |
| 439790   | Psychalgia                                 |
| 81634    | Ptotic breast                              |
| 253954   | Pulmonary tuberculosis                     |
| 4087647  | Rectal mass                                |
| 380706   | Regular astigmatism                        |
| 438688   | Sarcoidosis                                |
| 4169984  | Scar                                       |
| 141932   | Senile hyperkeratosis                      |
| 196236   | Septic shock                               |
| 254443   | Sjögren's syndrome                         |
| 36713918 | Somatic dysfunction of lumbar region       |
| 443172   | Splinter of face, without major open wound |
| 81151    | Sprain of ankle                            |
| 72748    | Strain of rotator cuff capsule             |
| 378427   | Tear film insufficiency                    |
| 134461   | Tietze's disease                           |
| 437264   | Tobacco dependence syndrome                |
| 4234533  | Tonsillitis                                |
| 4030042  | Toxic goiter                               |
| 81893    | Ulcerative colitis                         |
| 194083   | Vaginitis and vulvovaginitis               |
| 140641   | Verruca vulgaris                           |
| 380038   | Viral conjunctivitis                       |
| 4291005  | Viral hepatitis                            |
| 4248870  | Visceroptosis                              |
| 440193   | Wristdrop                                  |



## Covariates included in large-scale PS model

There are substantial variations in the range, resolution, and coding of clinical covariates captured in different healthcare databases. This makes it difficult to define a set of covariates to control for that is consistent across databases. OHDSI's Common Data Model (CDM) nonetheless allows us to define a consistent criteria broad enough to include most potential confounders, from which we can select a relevant subset in a data-driven manner using a sparse regression technique. The table below describes our selection criteria in more detail.

**Supplementary Table 4:** Within each database, a covariate is included in our PS model if its concept type falls within any of the following OHDSI CDM concept categories.

- Demographics (age in 5-year increments and month of index date)
- Condition Occurrence (condition occurrence in lookback window)
  - in 180 days prior to index date
  - in 90 days prior to index date
  - in 30 days prior to index date
- Condition Era (span of time when person assumed to have condition)
  - ever
  - overlapping with index date
- Drug Exposure (drug occurrence in lookback window)
  - in 180 days prior to index date
  - in 30 days prior to index date
- Drug Era (span of time when person assumed to have drug)
  - in 180 days prior to index date
  - in 30 days prior to index date
  - ever
  - overlapping with index date
- Procedure Occurrence
  - in 180 days prior to index date
  - in 30 days prior to index date
- Observation
  - in 180 days prior to index date
  - in 30 days prior to index date
  - observations count in 180 days prior to index date
- Measurement
  - in 180 days prior to index date
  - in 30 days prior to index date
  - high measurement in 90 days prior to index date
  - low measurement in 90 days prior to index date
  - measurements count in 180 days prior to index date
- Concepts Count in 180 days prior to index date
- Risk Scores (Charlson, DCSI, CHADS2)
